# Supplementary material for: Sesamoids in Caudata and Gymnophiona (Lissamphibia): absences and evidence
Source: PeerJ. 2020 Dec 18;8:e10595. doi: 10.7717/peerj.10595 (PMC7751427; doi:10.7717/peerj.10595)
Supplement: Supplemental Information 1 [file peerj-08-10595-s001.xlsx]

## Sheet: Caudata
FAMILY	SPECIES	Observed Specimens (collection number)	Source (literature or digital repository)
Ambystomatidae	Ambystoma altamirani	FMNH65563
Ambystomatidae	Ambystoma amblycephalum	FMNH196110
Ambystomatidae	Ambystoma annulatum	FMNH25280
Ambystomatidae	Ambystoma annulatum	FMNH41620
Ambystomatidae	Ambystoma annulatum	FMNH29149 (two specimens)
Ambystomatidae	Ambystoma dumerilii	BMNH1914	https://www.phenome10k.org/ambystoma-dumerilii		skull without lower jaw
Ambystomatidae	Ambystoma gracile	FMNH196169
Ambystomatidae	Ambystoma gracile	FMNH98643
Ambystomatidae	Ambystoma gracile	MVZ63775	http://digimorph.org/specimens/Ambystoma_gracile/whole/ ; https://www.phenome10k.org/ambystoma-gracile		skull and forelimbs
Ambystomatidae	Ambystoma jeffersonianum	FMNH11076
Ambystomatidae	Ambystoma jeffersonianum	FMNH28551
Ambystomatidae	Ambystoma jeffersonianum	FMNH93530
Ambystomatidae	Ambystoma jeffersonianum	FMNH93530
Ambystomatidae	Ambystoma jeffersonianum	FMNH93530
Ambystomatidae	Ambystoma jeffersonianum	FMNH84263
Ambystomatidae	Ambystoma jeffersonianum	FMNH84284
Ambystomatidae	Ambystoma jeffersonianum	FMNH84273
Ambystomatidae	Ambystoma jeffersonianum	FMNH15581
Ambystomatidae	Ambystoma jeffersonianum	FMNH196112
Ambystomatidae	Ambystoma jeffersonianum	FMNH207614
Ambystomatidae	Ambystoma laterale	FMNH276286
Ambystomatidae	Ambystoma macrodactylum	FMNH11277
Ambystomatidae	Ambystoma macrodactylum	FMNH6970
Ambystomatidae	Ambystoma macrodactylum	FMNH84369
Ambystomatidae	Ambystoma maculatum	FMNH98785
Ambystomatidae	Ambystoma maculatum	FMNH207615
Ambystomatidae	Ambystoma maculatum	FMNH275832
Ambystomatidae	Ambystoma maculatum	FMNH276287
Ambystomatidae	Ambystoma maculatum	FMNH98785
Ambystomatidae	Ambystoma maculatum		Carrol, 2007. The palaeozoic ancestry of salamanders, frogs and caecilians. Zoological Journal of the Linnean Society, 150: 1-140.
Ambystomatidae	Ambystoma maculatum	UF26607	https://www.morphosource.org/Search/Index?search=Ambystoma+maculatum ; https://www.phenome10k.org/ambystoma-maculatum	M20299-38425; M21033-39944	skull and post-skull
Ambystomatidae	Ambystoma mavortium	UF158300	https://www.morphosource.org/Detail/MediaDetail/Show/media_id/20299		skull and post-skull
Ambystomatidae	Ambystoma mexicanum	FMNH22887
Ambystomatidae	Ambystoma mexicanum	FMNH22888
Ambystomatidae	Ambystoma mexicanum	FMNH98647
Ambystomatidae	Ambystoma mexicanum	FMNH1810
Ambystomatidae	Ambystoma mexicanum	UMMZ181465	https://www.morphosource.org/Search/Index?search=Ambystoma+mexicanum	M29853-57183	skull and post-skull
Ambystomatidae	Ambystoma mexicanum	ZMB 84351	https://www.phenome10k.org/ambystoma-mexicanum		skull without lower jaw
Ambystomatidae	Ambystoma opacum	FMNH218901
Ambystomatidae	Ambystoma opacum	FMNH8510
Ambystomatidae	Ambystoma opacum	FMNH276288
Ambystomatidae	Ambystoma ordinarium	FMNH98786
Ambystomatidae	Ambystoma ordinarium	FMNH98644
Ambystomatidae	Ambystoma talpoideum	FMNH4845
Ambystomatidae	Ambystoma talpoideum	FMNH196163
Ambystomatidae	Ambystoma texanum	FMNH8015
Ambystomatidae	Ambystoma texanum	FMNH84643
Ambystomatidae	Ambystoma texanum	FMNH84644
Ambystomatidae	Ambystoma texanum	FMNH84645
Ambystomatidae	Ambystoma texanum	FMNH47005
Ambystomatidae	Ambystoma texanum	FMNH98646
Ambystomatidae	Ambystoma tigrinum	FMNH53905
Ambystomatidae	Ambystoma tigrinum	FMNH42115
Ambystomatidae	Ambystoma tigrinum	FMNH42114
Ambystomatidae	Ambystoma tigrinum	FMNH191770
Ambystomatidae	Ambystoma tigrinum	FMNH196156
Ambystomatidae	Ambystoma tigrinum	FMNH196178
Ambystomatidae	Ambystoma tigrinum	FMNH196130
Ambystomatidae	Ambystoma tigrinum	FMNH196116
Ambystomatidae	Ambystoma tigrinum	FMNH98638
Ambystomatidae	Ambystoma tigrinum	FMNH254989
Ambystomatidae	Ambystoma tigrinum	FMNH22010
Ambystomatidae	Ambystoma tigrinum		1) Pedersen SC. 1993. Skull growth in cannibalistic tiger salamanders, Ambystoma tigrinum. The Southwetern Naturalist, 38 (4): 316-324. 2) Reilly SM & Lauder GV. 1990. Metamorphosis of cranial design in Tiger Salamanders (Ambystoma tigrinum): a morphometric analysis of ontogenetic change. Journal of Morphology. 204: 121-137. 3) Naylor BG. 1978. The frontosquamosal arch in newts as a defence again…
Ambystomatidae	Ambystoma tigrinum	TNHC17991	http://digimorph.org/specimens/Ambystoma_tigrinum/head/		skull
Ambystomatidae	Ambystoma tigrinum diaboli	FMNH53904
Ambystomatidae	Ambystoma velasci	FMNH98640
Ambystomatidae	Ambystoma velasci	FMNH98641
Ambystomatidae	Ambystoma velasci	FMNH98781
Ambystomatidae	Ambystoma velasci	FMNH98783
Ambystomatidae	Dicamptodon tenebrosus	FMNH31814
Ambystomatidae	Dicamptodon ensatus	MVZ 69449	http://digimorph.org/specimens/Dicamptodon_ensatus/		skull
Ambystomatidae	Rhyacosiredon altamirani	FMNH98791
Ambystomatidae	Rhyacosiredon altamirani	FMNH98789
Ambystomatidae	Rhyacosiredon altamirani	FMNH98653
Ambystomatidae	Rhyacosiredon altamirani	FMNH98651
Ambystomatidae	Rhyacosiredon altamirani	FMNH98650
Amphiumidae	Amphiuma means	FMNH196098
Amphiumidae	Amphiuma means	FMNH98657
Amphiumidae	Amphiuma means	UF2760	https://www.morphosource.org/Search/Index?search=Amphiuma+means+	M19436-36808 ; M19447-36806	skull and post-skull
Amphiumidae	Amphiuma means	MNHN 1980-1627	https://phenome10k.org/amphiuma-means		skull without lower jaw
Amphiumidae	Amphiuma pholeter	UF162477	https://www.morphosource.org/Detail/SpecimenDetail/Show/specimen_id/14948	M29776-57016 ; M29776-57017	skull
Amphiumidae	Amphiuma pholeter	UF168293	https://www.morphosource.org/Detail/SpecimenDetail/Show/specimen_id/23864	M44399-80638; M44399-80639	skull
Amphiumidae	Amphiuma tridactylum	FMNH1959
Amphiumidae	Amphiuma tridactylum	UF89446	https://www.morphosource.org/Search/Index?search=Amphiuma+tridactylum	M44403-80714; M44403-80728	skull
Amphiumidae	Amphiuma tridactylum	BMNH 11.11.2.1.a	https://phenome10k.org/amphiuma-tridactylum		skull without lower jaw
Amphiumidae	Proamphiuma cretacea†		Gardner JD. 2003. The fossil salamander proamphiuma cretacea estes (Caudata; Amphiumidae) and relationships within the amphiumidae. Journal of Vertebrate Paleontology 23(4):769–782		early Paleocene
Cryptobranchidae	Andrias davidianus	BMNH 1911.8.30.1	https://www.phenome10k.org/andrias-davidianus		skull without lower jaw
Cryptobranchidae	Andrias japonicus	FMNH31028
Cryptobranchidae	Andrias japonicus	FMNH31314
Cryptobranchidae	Andrias japonicus	FMNH31028
Cryptobranchidae	Cryptobranchus alleganiensis	FMNH218080
Cryptobranchidae	Cryptobranchus alleganiensis	UF88726	https://www.morphosource.org/Detail/SpecimenDetail/Show/specimen_id/9173	M19257-36424	skull and post-skull
Cryptobranchidae	Cryptobranchus alleganiensis	UF10881	https://www.morphosource.org/Detail/MediaDetail/Show/media_id/31077	M31077-59329	skull
Cryptobranchidae	indet†		Vasilyan D, Zazhigin VS, Bohme M. 2017. Neogene amphibians and reptiles (Caudata, Anura, Gekkota, Lacertilia, and Testudines) from the south of Western Siberia, Russia, and Northeastern Kazakhstan. PeerJ 5:e3025; DOI 10.7717/peerj.3025
Cryptobranchidae	Chunerpeton tianyiensis †		1) Gao KQ, Shubin NH. 2003. Earliest known crown-group salamanders. Nature, 422: 424-427. 2) Carrol, 2007. The palaeozoic ancestry of salamanders, frogs and caecilians. Zoological Journal of the Linnean Society, 150: 1-140. 3) Gao KQ, Chen J. Jia J. 2013. Taxonomic diversity , startigraphic range, and exceptional preservation of Juro-Cretaceous salamanders from northern China. Ca. J. Earth Sci., …		Late Jurassic
Hynobiidae	Batrachuperus londongensis		Jiang JP, Jia J, Zhang M, Gao KQ. 2018. Osteology of Batrachuperus londongensis (Urodela, Hynobiidae): study of bony anatomy of a facultatively neotenic salamander from Mount Emei, Sichuan Province, China. PeerJ 6:e4517; DOI 10.7717/peerj.4517
Hynobiidae	Batrachuperus pinchonii	FMNH232829
Hynobiidae	Batrachoperus cochranae		Carrol, 2007. The palaeozoic ancestry of salamanders, frogs and caecilians. Zoological Journal of the Linnean Society, 150: 1-140.
Hynobiidae	Batrachoperus persicus	MVZ 241494	http://digimorph.org/specimens/Batrachuperus_persicus/		skull and forelimbs
Hynobiidae	Hynobius leechi	ZMB 29896	https://www.phenome10k.org/hynobius-leechi		skull without lower jaw
Hynobiidae	Hynobius naevius		Carrol, 2007. The palaeozoic ancestry of salamanders, frogs and caecilians. Zoological Journal of the Linnean Society, 150: 1-140.
Hynobiidae	Hynobius naevius	MNHN 1988 8238	https://www.phenome10k.org/hynobius-naevis		skull without lower jaw
Hynobiidae	Hynobius nebulosus	MNHN 1988 7073	https://www.phenome10k.org/hynobius-nebulosus		skull without lower jaw
Hynobiidae	Liua shihi	MVZ 231146	https://www.phenome10k.org/liua-shihi		skull without lower jaw
Hynobiidae	Liua tsinpaensis	FMNH50982
Hynobiidae	Onychodactylus japonicus	MVZ 129400	http://digimorph.org/specimens/Onychodactylus_japonicus/head/		skull
Hynobiidae	Onychodactylus fischeri	ZMB 45851	https://phenome10k.org/onychodactylus-fischeri		skull without lower jaw
Hynobiidae	Paradactylodon persicus	ZMB 45869	https://phenome10k.org/paradactylodon-persicus		skull without lower jaw
Hynobiidae	Paradactylodon persicus	MVZ 241494	https://phenome10k.org/paradactylodon-persicus-2		skull without lower jaw
Hynobiidae	Pseudohynobius flavimaculatus	MVZ 231152	https://www.phenome10k.org/pseudohynobius-flavomaculatus		skull without lower jaw
Hynobiidae	Ranodon cf. sibiricus†		Averianov A, Tjutkpva LA. 1995. Ranodon cf. Sibiriens (Amphibia, Caudata) from the upper pliocene of Southern Kazakhstan: The first fossil record of the family Hynobiidae. Paläontologische Zeitschrift 69(1):257-264		(Upper Pliocene)
Hynobiidae	Ranodon sibiricus		Jömann, Clemen, Greven. 2005. Notes on cranial ontogeny and delayed metamorphosis in the hynobiid salamander Ranodon sibiricus Kessler, 1866 (Urodela). Annals of Anatomy, 187: 305-321.
Hynobiidae	Ranodon sibiricus	UMMZ127463	https://www.morphosource.org/Detail/SpecimenDetail/Show/specimen_id/14971		skull ans postskull
Hynobiidae	Salamandrella keyserlingii	MNHN 0 2491	https://phenome10k.org/salamandrella-keyserlingii		skull without lower jaw
Hynobiidae	Salamandrella sp†		Vasilyan D, Zazhigin VS, Bohme M. 2017. Neogene amphibians and reptiles (Caudata, Anura, Gekkota, Lacertilia, and Testudines) from the south of Western Siberia, Russia, and Northeastern Kazakhstan. PeerJ 5:e3025; DOI 10.7717/peerj.3025		Neogeno ( Middle Miocene–Early Pleistocene)
Karauridae†	Karaurus†		Carrol, 2007. The palaeozoic ancestry of salamanders, frogs and caecilians. Zoological Journal of the Linnean Society, 150: 1-140.
Plethodontidae	Aneides aeneus		Wake DB. Comparative Osteology of the Plethodontid Salamander Genus Aneides. Journal of Morphology, 133: 77-118.
Plethodontidae	Aneides aeneus	BMNH 1957.1.7.55	https://www.phenome10k.org/aneides-aeneus		skull without lower jaw
Plethodontidae	Aneides ferreus		Wake DB. Comparative Osteology of the Plethodontid Salamander Genus Aneides. Journal of Morphology, 133: 77-118.
Plethodontidae	Aneides flavipunctatus		Wake DB. Comparative Osteology of the Plethodontid Salamander Genus Aneides. Journal of Morphology, 133: 77-118.
Plethodontidae	Aneides hardii		Wake DB. Comparative Osteology of the Plethodontid Salamander Genus Aneides. Journal of Morphology, 133: 77-118.
Plethodontidae	Aneides hardii	MNHN 1961-451	https://www.phenome10k.org/aneides-hardii		skull without lower jaw
Plethodontidae	Aneides lugubris		Wake DB. Comparative Osteology of the Plethodontid Salamander Genus Aneides. Journal of Morphology, 133: 77-118.
Plethodontidae	Aneides lugubris	MVZ 214426	http://digimorph.org/specimens/Aneides_lugubris/head/
Plethodontidae	Aquiloeurycea cephalica	FMNH98720
Plethodontidae	Batrachoseps attenuatus	FMNH71241
Plethodontidae	Batrachoseps attenuatus	FMNH71252
Plethodontidae	Batrachoseps attenuatus	FMNH196136
Plethodontidae	Batrachoseps attenuatus	FMNH196151
Plethodontidae	Bolitoglossa adspersa	ZMB 71710	https://www.phenome10k.org/bolitoglossa-adspersa		skull without lower jaw
Plethodontidae	Bolitoglossa altamazonica	BMNH 1913.7.28.29-30	https://www.phenome10k.org/bolitoglossa-altamazonica		skull without lower jaw
Plethodontidae	Bolitoglossa alvaradoi	BMNH 1896.10.8.77.	https://www.phenome10k.org/bolitoglossa-alvaradoi		skull without lower jaw
Plethodontidae	Bolitoglossa colonnea		Ehmcke J & Clemen G. 2003. The skull structure of six species of Mesoamerican plethodontid salamanders (Amphibia, Urodela). Annals of Anatomy, 185: 253-261.
Plethodontidae	Bolitoglossa dofleini		Ehmcke J & Clemen G. 2003. The skull structure of six species of Mesoamerican plethodontid salamanders (Amphibia, Urodela). Annals of Anatomy, 185: 253-261.
Plethodontidae	Bolitoglossa epimela	BMNH 1982.1495	https://www.phenome10k.org/bolitoglossa-epimela		skull without lower jaw
Plethodontidae	Bolitoglossa flaviventris	FMNH98728
Plethodontidae	Bolitoglossa flaviventris		Hansen AM, Tanner WW. 2015. A comparative osteological study of certain species belonging to the genus Bolitoglossa (Amphibia). The Great Basin Naturalist, 18: 85-100.
Plethodontidae	Bolitoglossa franklini	FMNH98732
Plethodontidae	Bolitoglossa franklini	UF72966	https://www.morphosource.org/Detail/SpecimenDetail/Show/specimen_id/9160	M19131-36329	skull ans postskull
Plethodontidae	Bolitoglossa franklini	UF172966	https://www.phenome10k.org/bolitoglossa-franklini		skull without lower jaw
Plethodontidae	Bolitoglossa lignicolor		Ehmcke J & Clemen G. 2003. The skull structure of six species of Mesoamerican plethodontid salamanders (Amphibia, Urodela). Annals of Anatomy, 185: 253-261.
Plethodontidae	Bolitoglossa lignicolor	BMNH 1901.12.19.13	https://www.phenome10k.org/bolitoglossa-lignicolor		skull without lower jaw
Plethodontidae	Bolitoglossa marmorea		Ehmcke J & Clemen G. 2003. The skull structure of six species of Mesoamerican plethodontid salamanders (Amphibia, Urodela). Annals of Anatomy, 185: 253-261.
Plethodontidae	Bolitoglossa mexicana	FMNH91455
Plethodontidae	Bolitoglossa mexicana	FMNH4543
Plethodontidae	Bolitoglossa mexicana	BMNH 1967.12.47.	https://www.phenome10k.org/bolitoglossa-mexicana		skull without lower jaw
Plethodontidae	Bolitoglossa nicefori		Dulcey Cala CJ, Tarazona OA, Ramírez-Pinilla MP. 2009. The morphology and post-hatching development of the skull of Bolitoglossa nicefori (Caudata: Plethodontidae): developmental implications of recapitulation and repatterning. Zoology 112: 227-239.
Plethodontidae	Bolitoglossa occidentalis	FMNH196223
Plethodontidae	Bolitoglossa occidentalis		Hansen AM, Tanner WW. 2015. A comparative osteological study of certain species belonging to the genus Bolitoglossa (Amphibia). The Great Basin Naturalist, 18: 85-100.
Plethodontidae	Bolitoglossa platydactyla	FMNH70067
Plethodontidae	Bolitoglossa platydactyla	FMNH70113
Plethodontidae	Bolitoglossa platydactyla	FMNH70165
Plethodontidae	Bolitoglossa platydactyla	FMNH70077
Plethodontidae	Bolitoglossa platydactyla	FMNH70111
Plethodontidae	Bolitoglossa platydactyla	FMNH70157
Plethodontidae	Bolitoglossa platydactyla	FMNH70083
Plethodontidae	Bolitoglossa platydactyla	FMNH98740
Plethodontidae	Bolitoglossa platydactyla	FMNH98794
Plethodontidae	Bolitoglossa platydactyla		Hansen AM, Tanner WW. 2015. A comparative osteological study of certain species belonging to the genus Bolitoglossa (Amphibia). The Great Basin Naturalist, 18: 85-100.
Plethodontidae	Bolitoglossa platydactyla	BMNH 68.4.7.39	https://www.phenome10k.org/bolitoglossa-platydactyla		skull without lower jaw
Plethodontidae	Bolitoglossa porrasorum	UF156522	https://www.phenome10k.org/bolitoglossa-porrasorum		skull without lower jaw
Plethodontidae	Bolitoglossa rostrata	FMNH20234
Plethodontidae	Bolitoglossa rostrata	FMNH20234
Plethodontidae	Bolitoglossa rostrata	FMNH20234
Plethodontidae	Bolitoglossa rostrata	FMNH20234
Plethodontidae	Bolitoglossa rostrata	FMNH218903
Plethodontidae	Bolitoglossa rostrata	BMNH 1957.5.1.3-4	https://www.phenome10k.org/bolitoglossa-rostrata		skull without lower jaw
Plethodontidae	Bolitoglossa rufescens	FMNH122144
Plethodontidae	Bolitoglossa rufescens	FMNH70189
Plethodontidae	Bolitoglossa rufescens	FMNH276267
Plethodontidae	Bolitoglossa rufescens	FMNH276266
Plethodontidae	Bolitoglossa rufescens		Hansen AM, Tanner WW. 2015. A comparative osteological study of certain species belonging to the genus Bolitoglossa (Amphibia). The Great Basin Naturalist, 18: 85-100.
Plethodontidae	Bolitoglossa rufescens	BMNH 83.7.26.31	https://www.phenome10k.org/bolitoglossa-rufescens		skull without lower jaw
Plethodontidae	Bolitoglossa salvinii	BMNH 61.1.26.398	https://www.phenome10k.org/bolitoglossa-salvinii		skull without lower jaw
Plethodontidae	Bolitoglossa schizodactyla		Ehmcke J & Clemen G. 2003. The skull structure of six species of Mesoamerican plethodontid salamanders (Amphibia, Urodela). Annals of Anatomy, 185: 253-261.
Plethodontidae	Bolitoglossa striatula		Ehmcke J & Clemen G. 2003. The skull structure of six species of Mesoamerican plethodontid salamanders (Amphibia, Urodela). Annals of Anatomy, 185: 253-261.
Plethodontidae	Bolitoglossa subpalmata	FMNH196117
Plethodontidae	Bolitoglossa subpalmata	FMNH196192
Plethodontidae	Bolitoglossa subpalmata	FMNH98730
Plethodontidae	Bolitoglossa subpalmata	MNHN 1991-552	https://www.phenome10k.org/bolitoglossa-subpalmata		skull without lower jaw
Plethodontidae	Bradytriton silus	MVZ 265367	https://www.phenome10k.org/bradytriton-silus		skull without lower jaw
Plethodontidae	Cryptotriton adelos		Wake DB, Rovito SM, Maisano JA, Hanken J. 2012. Taxonomic status of the enigmatic salamander Cryptotriton adelos (Amphibia: Plethodontidae) from northern Oaxaca, Mexico, with observations on its skull and postcranial skeleton. Zootaxa 3579: 67-70.
Plethodontidae	Cryptotriton adelos	MVZ 208582	http://digimorph.org/specimens/Thorius_adelos/head/		skull
Plethodontidae	Chiropterotriton chiropterus	FMNH169708
Plethodontidae	Chiropterotriton chiropterus	FMNH169707
Plethodontidae	Chiropterotriton chiropterus	FMNH169703
Plethodontidae	Chiropterotriton chiropterus	MVZ 85602	http://digimorph.org/specimens/Chiropterotriton_chiropterus/head/		skull
Plethodontidae	Chiropterotriton chiropterus	MVZ 85602	https://www.phenome10k.org/chiropterotriton-chiropterus		skull without lower jaw
Plethodontidae	Chiropterotriton dimidiatus	FMNH169705
Plethodontidae	Chiroptirotriton dimidiatus		Darda DN, Wake DB. 2015. Osteological variation among extreme morphological forms in the mexican slamander genus Chiropterotriton (Amphibia: Plethodontidae): Morphological Evolution And Homoplasy. PLoS ONE 10(6): e0127248. doi:10.1371/journal.pone.0127248
Plethodontidae	Chiroptirotriton lavae		Darda DN, Wake DB. 2015. Osteological variation among extreme morphological forms in the mexican slamander genus Chiropterotriton (Amphibia: Plethodontidae): Morphological Evolution And Homoplasy. PLoS ONE 10(6): e0127248. doi:10.1371/journal.pone.0127250
Plethodontidae	Chiroptirotriton magnipes		Darda DN, Wake DB. 2015. Osteological variation among extreme morphological forms in the mexican slamander genus Chiropterotriton (Amphibia: Plethodontidae): Morphological Evolution And Homoplasy. PLoS ONE 10(6): e0127248. doi:10.1371/journal.pone.0127251
Plethodontidae	Chiropterotriton magnipes	MVZ 163964	http://digimorph.org/specimens/Chiropterotriton_magnipes/head/		skull
Plethodontidae	Chiropterotriton multidentatus	FMNH98679
Plethodontidae	Chiropterotriton multidentatus	FMNH169711
Plethodontidae	Chiropterotriton multidentatus	MVZ 163907	https://www.phenome10k.org/chiropterotriton-multidentatus		skull without lower jaw
Plethodontidae	Chiroptirotriton priscus		Darda DN, Wake DB. 2015. Osteological variation among extreme morphological forms in the mexican slamander genus Chiropterotriton (Amphibia: Plethodontidae): Morphological Evolution And Homoplasy. PLoS ONE 10(6): e0127248. doi:10.1371/journal.pone.0127249
Plethodontidae	Chiropterotriton priscus	MVZ 192793	http://digimorph.org/specimens/Chiropterotriton_priscus/		skull
Plethodontidae	Chiropterotriton priscus	MVZ 69449	https://www.phenome10k.org/chiropterotriton-priscus		**
Plethodontidae	Dendrotriton bromeliaceus	BMNH 1946.9.6.37	https://www.phenome10k.org/dendrotriton-bromeliacius		**
Plethodontidae	Desmognathus aeneus	FMNH86744
Plethodontidae	Desmognathus aeneus	FMNH86743
Plethodontidae	Desmognathus aeneus	FMNH90062
Plethodontidae	Desmognathus apalachicolae	UF157813	https://www.morphosource.org/Detail/SpecimenDetail/Show/specimen_id/3536	M8917-11526	skull without lower jaw
Plethodontidae	Desmognathus apalachicolae	UF157832	https://www.morphosource.org/Detail/MediaDetail/Show/media_id/8922	M8922-11535; M8922-11536	skull without lower jaw
Plethodontidae	Desmognathus auriculatus	UF156936	https://www.morphosource.org/Detail/SpecimenDetail/Show/specimen_id/3518	M8884-11410	skull without lower jaw
Plethodontidae	Desmognathus auriculatus	UF156938	https://www.morphosource.org/Detail/MediaDetail/Show/media_id/8905	M8905-11503	skull without lower jaw
Plethodontidae	Desmognathus fuscus	FMNH93511
Plethodontidae	Desmognathus fuscus	FMNH93500
Plethodontidae	Desmognathus fuscus	FMNH218591
Plethodontidae	Desmognathus fuscus	FMNH218597
Plethodontidae	Desmognathus fuscus	FMNH218589
Plethodontidae	Desmognathus fuscus	MNHN 1980-1571	https://www.phenome10k.org/desmognathus-fuscus		skull without lower jaw
Plethodontidae	Desmognathus marmoratus	BMNH 1957.1.8.5	https://www.phenome10k.org/desmognathus-marmoratus		skull without lower jaw
Plethodontidae	Desmognathus marmoratus	ZMB 29849	https://www.phenome10k.org/desmognathus-marmoratus-2		skull without lower jaw
Plethodontidae	Desmognathus monticola	FMNH15998
Plethodontidae	Desmognathus monticola	FMNH93934
Plethodontidae	Desmognathus ochrophaeus	FMNH93506
Plethodontidae	Desmognathus ochrophaeus	FMNH93507
Plethodontidae	Desmognathus ochrophaeus	FMNH98804
Plethodontidae	Desmognathus ochrophaeus	FMNH207581
Plethodontidae	Desmognathus ochrophaeus	FMNH207581
Plethodontidae	Desmognathus ochrophaeus	BMNH 4.9.22	https://www.phenome10k.org/desmognathus-ochnophaeus		skull without lower jaw
Plethodontidae	Desmognathus ocoee	FMNH93521
Plethodontidae	Desmognathus ocoee	FMNH93517
Plethodontidae	Desmognathus ocoee	FMNH93516
Plethodontidae	Desmognathus quadramaculatus	FMNH93518
Plethodontidae	Desmognathus quadramaculatus	BMNH 1957.1.7.76-77.	https://www.phenome10k.org/desmognathus-quadramaculatus		skull without lower jaw
Plethodontidae	Desmognathus wrighti	FMNH93515
Plethodontidae	Ensatina eschscholtzi	MNHN 1994 5910	https://www.phenome10k.org/ensatina-eschscholtzi		skull without lower jaw
Plethodontidae	Eurycea bislineata	FMNH93522
Plethodontidae	Eurycea bislineata	FMNH91073
Plethodontidae	Eurycea bislineata	MNHN 2007-2498	https://www.phenome10k.org/eurycea-bislineata		skull without lower jaw
Plethodontidae	Eurycea cirrigera	FMNH93520
Plethodontidae	Eurycea cirrigera	FMNH91076
Plethodontidae	Eurycea cirrigera	BMNH 1957.1.7.84-85	https://www.phenome10k.org/eurycea-cirrigera		skull without lower jaw
Plethodontidae	Eurycea guttolineata	FMNH90872
Plethodontidae	Eurycea guttolineata	FMNH93512
Plethodontidae	Eurycea longicauda	FMNH93513
Plethodontidae	Eurycea longicauda	FMNH91078
Plethodontidae	Eurycea longicauda	ZMB 13190	https://www.phenome10k.org/eurycea-longicauda		skull without lower jaw
Plethodontidae	Eurycea lucifuga	FMNH51632
Plethodontidae	Eurycea lucifuga	FMNH93523
Plethodontidae	Eurycea lucifuga	BMNH 1957.1.7.86	https://www.phenome10k.org/eurycea-lucifuga		skull without lower jaw
Plethodontidae	Eurycea nana	FMNH246896
Plethodontidae	Eurycea neotenes	BMNH 1957.1.7.88-89	https://www.phenome10k.org/eurycea-neotenes		skull without lower jaw
Plethodontidae	Eurycea pterophila	FMNH91069
Plethodontidae	Eurycea pterophila	FMNH91070
Plethodontidae	Eurycea rathbuni	FMNH26259
Plethodontidae	Eurycea rathbuni	FMNH18350
Plethodontidae	Eurycea rathbuni	TNHC 51176	http://digimorph.org/specimens/Eurycea_rathbuni/head/		skull
Plethodontidae	Eurycea sp	FMNH93527
Plethodontidae	Eurycea sp	NCSM24613	https://www.morphosource.org/Detail/SpecimenDetail/Show/specimen_id/10057	M20900-39694	skull and postskull
Plethodontidae	Eurycea robusta	TNHC 20255	http://digimorph.org/specimens/Eurycea_robusta/head/		skull
Plethodontidae	Eurycea spelaea	FMNH57016
Plethodontidae	Eurycea spelaea	FMNH93524
Plethodontidae	Eurycea spelaea	FMNH93531
Plethodontidae	Eurycea spelaea	FMNH93532
Plethodontidae	Eurycea spelaea	BMNH 1957.1.8.41	https://www.phenome10k.org/eurycea-spaelea		skull without lower jaw
Plethodontidae	Eurycea sosorum	TNHC 50916	http://digimorph.org/specimens/Eurycea_sosorum/head/		skull
Plethodontidae	Eurycea waterlooensis	TNHC 60202	http://digimorph.org/specimens/Eurycea_waterlooensis/head/		skull
Plethodontidae	Eurycea wilderae	FMNH91075
Plethodontidae	Eurycea wilderae	FMNH91074
Plethodontidae	Gyrinophilus porphyriticus	FMNH91167
Plethodontidae	Gyrinophilus porphyriticus	FMNH91173
Plethodontidae	Gyrinophilus porphyriticus	FMNH91171
Plethodontidae	Gyrinophilus porphyriticus	FMNH91170
Plethodontidae	Gyrinophilus porphyriticus	FMNH91169 (three specimens)
Plethodontidae	Gyrinophilus porphyriticus	FMNH91171 (three specimens)
Plethodontidae	Gyrinophilus porphyriticus	FMNH207603
Plethodontidae	Gyrinophilus porphyriticus	FMNH207607
Plethodontidae	Gyrinophilus porphyriticus	FMNH207604
Plethodontidae	Gyrinophilus porphyriticus	FMNH91174 (three specimens)
Plethodontidae	Gyrinophilus porphyriticus	UF64645	https://www.morphosource.org/Detail/SpecimenDetail/Show/specimen_id/9162	M19150-36205	skull and post-skull
Plethodontidae	Gyrinophilus porphyriticus	ZMB29766	https://www.phenome10k.org/gyrinophilus-porphryticus		skull without lower jaw
Plethodontidae	Gyrinophilus sp	FMNH91279
Plethodontidae	Hemidactylium scutatum	FMNH207600
Plethodontidae	Hemidactylium scutatum	ZMB 3603	https://www.phenome10k.org/hemidactylium-scutatum		skull without lower jaw
Plethodontidae	Hydromantes platycephalus	uncatalogued	http://digimorph.org/specimens/Hydromantes_platycephalus/		skull and forelimbs
Plethodontidae	Hydromantes platycephalus		Buckley D, Wake MH, Wake DB. 2010. Comparative skull osteology of Karsenia koreana (Amphibia, Caudata, Plethodontidae). Journal of Morphology, 271: 533-559.		Buckley D, Wake MH, Wake DB. Comparative skull osteology of Karsenia koreana (Amphibia, Caudata, Plethodontidae). J morphol., 271: 533-559.	Buckley D, Wake MH, Wake DB. Comparative skull osteology of Karsenia koreana (Amphibia, Caudata, Plethodontidae). J morphol., 271: 533-559.
Plethodontidae	Isthmura bellii belli	ZMB 3609	https://www.phenome10k.org/scans/9		skull without lower jaw
Plethodontidae	Karsenia koreana		1) Buckley D, Wake MH, Wake DB. 2010. Comparative skull osteology of Karsenia koreana (Amphibia, Caudata, Plethodontidae). J Morphol., 271: 533-559. 2)Min MS, Yang SY, Bonett RM, Vieites DR, Brandon RA, Wake DB. 2005. Discovery of the first Asian plethodontid salamander. Nature, 435: 87-90.
Plethodontidae	Karsenia koreana	DRV (5033)	http://digimorph.org/specimens/Karsenia_koreana/head/		skull
Plethodontidae	Oedipina complex	FMNH121221
Plethodontidae	Oedipina complex	FMNH121219
Plethodontidae	Oedipina complex	FMNH121218
Plethodontidae	Oedipina complex	FMNH98760
Plethodontidae	Oedipina uniformis	MVZ190853	https://www.morphosource.org/Detail/MediaDetail/Show/media_id/29130	M29130-55883	skull
Plethodontidae	Oedipina uniformis	ZMB 31981	https://www.phenome10k.org/oedipina-uniformis		skull without lower jaw
Plethodontidae	Nyctalonis pernix	MVZ 263972	https://www.phenome10k.org/nyctanolis-pernix		skull without lower jaw
Plethodontidae	Parvimolge townsendi	MVZ 163723	https://phenome10k.org/parvimolge-townsendi		skull without lower jaw
Plethodontidae	Plethodon hubrichti	MVZ 201250	http://digimorph.org/specimens/Phaeognathus_hubrichti/		skull
Plethodontidae	Plethodon albagula	FMNH275826
Plethodontidae	Plethodon cheoah	NCSM80273	https://www.morphosource.org/Detail/MediaDetail/Show/media_id/31247	M31261-70032	skull ans post-skull
Plethodontidae	Plethodon cinereus	FMNH207599
Plethodontidae	Plethodon cinereus	FMNH196091
Plethodontidae	Plethodon cinereus		Kearney RR, Hanken J, Blackburn DC. 2018. Early limb patterning in the direc-developing salamander Plethodon cinereus revealed by sox9 and col2a1. Evolution & Development, 20: 100-107.
Plethodontidae	Plethodon cinereus	ZMB 32624	https://phenome10k.org/plethodon-cinereus		skull without lower jaw
Plethodontidae	Plethodon dorsalis	FMNH276293
Plethodontidae	Plethodon elongatus	BMNH 1957.1.8.8-9	https://phenome10k.org/plethodon-elongatus		skull without lower jaw
Plethodontidae	Plethodon fourchensis	BMNH 1983.1346.1347	https://phenome10k.org/plethodon-fourchensis		skull without lower jaw
Plethodontidae	Plethodon glutinosus	UF 16267	https://phenome10k.org/plethodon-grobmani		skull without lower jaw
Plethodontidae	Plethodon glutinosus	FMNH92631
Plethodontidae	Plethodon glutinosus	FMNH163800
Plethodontidae	Plethodon glutinosus	FMNH92586
Plethodontidae	Plethodon glutinosus	FMNH92587
Plethodontidae	Plethodon glutinosus	FMNH207616
Plethodontidae	Plethodon glutinosus	FMNH98823
Plethodontidae	Plethodon glutinosus	FMNH98822
Plethodontidae	Plethodon glutinosus	ZMB 49187	https://phenome10k.org/plethodon-glutinosus		skull without lower jaw
Plethodontidae	Plethodon jordani	FMNH92611
Plethodontidae	Plethodon jordani	FMNH92612
Plethodontidae	Plethodon jordani	FMNH246388
Plethodontidae	Plethodon jordani	FMNH247105 (four specimens)
Plethodontidae	Plethodon ouachitae	FMNH196216
Plethodontidae	Plethodon ouachitae	FMNH196217
Plethodontidae	Plethodon ouachitae	FMNH196218
Plethodontidae	Plethodon sp	FMNH93529
Plethodontidae	Plethodon serratus	BMNH 1983-1348-1349	https://phenome10k.org/plethodon-serratus		skull without lower jaw
Plethodontidae	Plethodon vandikey	BMNH 1925.5.1.10	https://phenome10k.org/plethodon-vandykei		skull without lower jaw
Plethodontidae	Plethodon wehrlei	FMNH207611
Plethodontidae	Plethodon wehrlei	FMNH207610
Plethodontidae	Plethodon wehrlei	BMNH 1957.1.8.33-34	https://phenome10k.org/plethodon-welleri		skull without lower jaw
Plethodontidae	Plethodon yonahlossee	BMNH 1957.1.8.32	https://phenome10k.org/plethodon-yonahlossee		skull without lower jaw
Plethodontidae	Pseudoeurycea lineola	UF 62921	https://www.phenome10k.org/pseudoeurycea-lineola		skull without lower jaw
Plethodontidae	Pseudoeurycea leprosa	ZMB 25931	https://www.phenome10k.org/pseudoeurycea-leprosa		skull without lower jaw
Plethodontidae	Pseudoerycea robertsi	FMNH98717
Plethodontidae	Pseudoerycea robertsi	FMNH98718
Plethodontidae	Pseudoerycea robertsi	FMNH196097
Plethodontidae	Pseudoeurycea gadovii	FMNH98726
Plethodontidae	Pseudoeurycea gadovii	FMNH98832
Plethodontidae	Pseudoeurycea gadovii	FMNH98726
Plethodontidae	Pseudoeurycea gadovii	FMNH98723
Plethodontidae	Pseudoeurycea gadovii	FMNH98724
Plethodontidae	Pseudoeurycea gadovii	FMNH98725
Plethodontidae	Pseudoeurycea gadovii	FMNH98730
Plethodontidae	Pseudoeurycea gadovii	FMNH98719
Plethodontidae	Pseudoeurycea gadovii	FMNH98721
Plethodontidae	Pseudoeurycea gadovii	FMNH98722
Plethodontidae	Pseudoeurycea leprosa	FMNH98705
Plethodontidae	Pseudoeurycea leprosa	FMNH98706
Plethodontidae	Pseudoeurycea leprosa	FMNH98707
Plethodontidae	Pseudoeurycea leprosa	FMNH98708
Plethodontidae	Pseudoeurycea leprosa	FMNH98709
Plethodontidae	Pseudoeurycea leprosa	FMNH98711
Plethodontidae	Pseudoeurycea leprosa	FMNH98831
Plethodontidae	Pseudoeurycea leprosa	FMNH98842
Plethodontidae	Pseudoeurycea leprosa	FMNH98843
Plethodontidae	Pseudoeurycea leprosa	FMNH276159
Plethodontidae	Pseudoeurycea leprosa	FMNH276160
Plethodontidae	Pseudoeurycea lineola	FMNH98658
Plethodontidae	Pseudoeurycea lineola	FMNH98659
Plethodontidae	Pseudoeurycea smithi	FMNH196175
Plethodontidae	Pseudoeurycea smithi	FMNH98714
Plethodontidae	Pseudoeurycea smithi	FMNH98715
Plethodontidae	Pseudoeurycea unguidentis	FMNH98716
Plethodontidae	Pseudotriton ruber	FMNH276135
Plethodontidae	Pseudotriton ruber	MNHN 1961 462	https://www.phenome10k.org/pseudotriton-ruber		skull without lower jaw
Plethodontidae	Pseudotriton montanus	BMNH 1957.1.8.3738 1	https://www.phenome10k.org/pseudotriton-montanus		skull without lower jaw
Plethodontidae	Stereochilus marginatus	BMNH 1957.1.8.39	https://www.phenome10k.org/stereochilus-marginatus		skull without lower jaw
Plethodontidae	Thorius aureus		Hanken J, Wake DB. 1994. Five new species of minute salamanders, genus Thorius (Caudata: plethodontidae), from Northern Oaxaca, Mexico. Copeia, 1994 (3): 573-590
Plethodontidae	Thorius aureus	MVZ 85963	http://digimorph.org/specimens/Thorius_aureus/		skull and forelimbs
Plethodontidae	Thorius dubitus	FMNH169729
Plethodontidae	Thorius longicaudus	MCZ A-137819	http://digimorph.org/specimens/Thorius_longicaudus/anterior/		skull and forelimbs
Plethodontidae	Thorius minutissimus	IBH 23011	http://digimorph.org/specimens/Thorius_minutissimus/head/		skull
Plethodontidae	Thorius narisovalis	FMNH169717
Plethodontidae	Thorius narisovalis	MVZ 162257	http://digimorph.org/specimens/Thorius_narisovalis/head/		skull
Plethodontidae	Thorius narisovalis	MVZ 162257	https://www.phenome10k.org/thorius-narisovalis		skull without lower jaw
Plethodontidae	Thorius pennatulus	ZMB 17835	https://www.phenome10k.org/scans/11		skull without lower jaw
Plethodontidae	Thorius pinicola	MCZ A-136429	http://digimorph.org/specimens/Thorius_pinicola/		skull and forelimbs
Plethodontidae	Thorius pinicola	MVZ 136429	https://www.phenome10k.org/thorius-pinicola		skull without lower jaw
Plethodontidae	Thorius pulmonaris	FMNH169715
Plethodontidae	Thorius pulmonaris	FMNH169714
Plethodontidae	Thorius tlaxiacus	MVZ 183447	http://digimorph.org/specimens/Thorius_tlaxiacus/		skull and forelimbs
Proteidae	Necturus beyeri	UF177187	https://www.morphosource.org/Detail/MediaDetail/Show/media_id/20810	M20811-39589; M20810-39588	skull and post-skull
Proteidae	Necturus lewisi	NCSM76356	https://www.morphosource.org/Detail/MediaDetail/Show/media_id/20783	M20783-39561	skull and post-skull
Proteidae	Necturus maculosus	FMNH286705
Proteidae	Necturus maculosus	FMNH275833
Proteidae	Necturus maculosus	FMNH21524
Proteidae	Necturus maculosus	FMNH211526
Proteidae	Necturus maculosus	FMNH211525
Proteidae	Necturus maculosus	FMNH211523
Proteidae	Necturus maculosus	TNHC 53001	http://digimorph.org/specimens/Necturus_maculosus/head/		skull
Proteidae	Proteus anguinis	MVZ244076	https://www.morphosource.org/Detail/MediaDetail/Show/media_id/64901	M64901-116585	skull
Proteidae	Proteus anguinis	BMNH 1920.1.20.3	https://phenome10k.org/proteus-anguinus		skull without lower jaw
Proteidae	Paranecturus garbanii †		Demar DG. 2013. A new fossil salamander (Caudata, Proteidae) from Upper Cretaceous (Maasstrichtian) Hell Creek Formation, Montana, U.S.A. Journal of Vertebrate Paleontology, 33: 588-598.
Proteidae	Mioproteus sp †	Vasilyan D, Zazhigin VS, Bohme M. 2017. Neogene amphibians and reptiles (Caudata, Anura, Gekkota, Lacertilia, and Testudines) from the south of Western Siberia, Russia, and Northeastern Kazakhstan. PeerJ 5:e3025; DOI 10.7717/peerj.3025			Neogeno ( Middle Miocene–Early Pleistocene)
Rhyacotritonidae	Rhyacotriton olympicus	FMNH27113
Rhyacotritonidae	Rhyacotriton olympicus	FMNH27111
Rhyacotritonidae	Rhyacotriton olympicus	FMNH204671
Rhyacotritonidae	Rhyacotriton olympicus	FMNH204668
Rhyacotritonidae	Rhyacotriton olympicus	UMMZ135501	https://www.morphosource.org/Detail/MediaDetail/Show/media_id/29849	M29849-57175	skull and post-skull
Rhyacotritonidae	Rhyacotriton olympicus	MNHN 1922 180	https://www.phenome10k.org/rhyacotriton-olympicus-2		skull without lower jaw
Rhyacotritonidae	Rhyacotriton olympicus	BMNH 1953.1.5.81	https://www.phenome10k.org/rhyacotriton-olympicus		skull without lower jaw
Rhyacotritonidae	Rhyacotriton kezeri		Good DA, Wake DB. 1992. Geographic variation and speciation in the torrent salamanders of the genus Rhyacotriton (Caudata: Rhyacotritonidae). A contribution from the museum of Vertebrate Zoology of the University of California at Berkeley. 1-609 pp.
Rhyacotritonidae	Rhyacotriton variegatus	MVZ 98409	http://digimorph.org/specimens/Rhyacotriton_variegatus/head/		skull
Rhyacotritonidae	Rhyacotriton variegatus		Good DA, Wake DB. 1992. Geographic variation and speciation in the torrent salamanders of the genus Rhyacotriton (Caudata: Rhyacotritonidae). A contribution from the museum of Vertebrate Zoology of the University of California at Berkeley. 1-609 pp.
Salamandridae	Chelotriton sp †		Vasilyan D, Zazhigin VS, Bohme M. 2017. Neogene amphibians and reptiles (Caudata, Anura, Gekkota, Lacertilia, and Testudines) from the south of Western Siberia, Russia, and Northeastern Kazakhstan. PeerJ 5:e3025; DOI 10.7717/peerj.3025		Neogeno ( Middle Miocene–Early Pleistocene)
Salamandridae	Tylotriton sp †		Vasilyan D, Zazhigin VS, Bohme M. 2017. Neogene amphibians and reptiles (Caudata, Anura, Gekkota, Lacertilia, and Testudines) from the south of Western Siberia, Russia, and Northeastern Kazakhstan. PeerJ 5:e3025; DOI 10.7717/peerj.3025		Neogeno ( Middle Miocene–Early Pleistocene)
Salamandridae	Calotriton asper	MNHN 1971 352	https://www.phenome10k.org/calotriton-asper		skull without lower jaw
Salamandridae	Calotriton asper	ZMB 84359	https://www.phenome10k.org/calotriton-asper-2		skull without lower jaw
Salamandridae	Cynops ensicauda	FMNH204665
Salamandridae	Cynops orientalis	FMNH93541
Salamandridae	Cynops pyrrhogaster	FMNH204681
Salamandridae	Cynops pyrrhogaster	FMNH204677
Salamandridae	Cynops pyrrhogaster	FMNH285002
Salamandridae	Cynops pyrrhogaster	FMNH283810
Salamandridae	Cynops wolterstorffi	ZMB 29895	https://www.phenome10k.org/hypselotriton-wolterstorffi		skull without lower jaw
Salamandridae	Echinotriton andersoni	UMMZ174420	https://www.morphosource.org/Detail/SpecimenDetail/Show/specimen_id/14974	M29851-57179	skull and post-skull
Salamandridae	Euproctus montanus	BMNH 1891.6.15.7	https://www.phenome10k.org/euproctus-montanus		skull without lower jaw
Salamandridae	Euproctus platycephalus	ZMB 33680	https://www.phenome10k.org/euproctus-platycephalus		skull without lower jaw
Salamandridae	Ichthyosaura alpestris	FMNH93540
Salamandridae	Ichthyosaura alpestris		1) Djorovic A, Kalezic ML. 2000. Paedogenesis in european newts (Triturus: Salamandridae): cranial morphology during ontogeny. Journal of Morphology, 243: 127-139. 2)Ivanovic A, Kalezic ML, Aleksic I. (2005). Morphological integration of cranium and postcranial skeleton during ontogeny of facultative paedomorphic European newts (Triturus vulgaris and T. alpestris). Amphibia-Reptilia, 26: 485-495.…
Salamandridae	Lissotriton helveticus		Naylor BG. (1978). The frontosquamosal arch in newts as a defence against predators. Cannadia Journal of Zoology, 56: 2211-2217.
Salamandridae	Lissotriton helviticus	UF38991	https://www.morphosource.org/Detail/MediaDetail/Show/media_id/19176	M19176-36253; M19141-36186	skull
Salamandridae	Lissotriton helviticus	MNHN 1992 4063	https://www.phenome10k.org/lissotriton-helveticus		skull without lower jaw
Salamandridae	Lissotriton montadoni	ZMB 72731	https://www.phenome10k.org/lissotriton-montandoni		skull without lower jaw
Salamandridae	Lissotriton vulgaris	FMNH93541
Salamandridae	Lissotriton vulgaris	FMNH93541
Salamandridae	Lissotriton vulgaris		1) Djorovic A, Kalezic ML. 2000. Paedogenesis in european newts (Triturus: Salamandridae): cranial morphology during ontogeny. Journal of Morphology, 243: 127-139. 2)Ivanovic A, Kalezic ML, Aleksic I. (2005). Morphological integration of cranium and postcranial skeleton during ontogeny of facultative paedomorphic European newts (Triturus vulgaris and T. alpestris). Amphibia-Reptilia, 26: 485-495.…
Salamandridae	Lissotriton vulgaris	UF39025	https://www.morphosource.org/Detail/MediaDetail/Show/media_id/19252	M19260-36436	skull and post-skull
Salamandridae	Lissotriton vulgaris	ZMB 72731	https://www.phenome10k.org/lissotriton-vulgaris		skull without lower jaw
Salamandridae	Lyciasalamandra atifi	ZMB 45868	https://www.phenome10k.org/lyciasalamandra-atifi		skull without lower jaw
Salamandridae	Lyciasalamandra atifi	BMNH 1964.354	https://www.phenome10k.org/lyciasalamandra-luschani		skull without lower jaw
Salamandridae	Neurergus crocatus	FMNH19629
Salamandridae	Neurergus crocatus	MVZ236763	https://www.morphosource.org/Detail/MediaDetail/Show/media_id/31109	M31109-115437	skull
Salamandridae	Neurergus crocatus	BMNH 1968-852	https://www.phenome10k.org/neurergus-crocatus		skull without lower jaw
Salamandridae	Neurergus derjugini		Akia F, Rastegar-Pouyani N, Faizi H. 2010. The comparison of cranial osteology of Neurergus microspilotus and Salamandra infraimmaculata semenovi (Amphibia: Salamandridae). Russian Journal of Herpetology, 17 (3): 179-184.
Salamandridae	Neurergus kaiseri	BMNH 1952.1.2.85	https://www.phenome10k.org/neurergus-kaiseri		skull without lower jaw
Salamandridae	Neurergus miscrospilotus	ZMB 45871	https://www.phenome10k.org/neurergus-microspilotus		skull without lower jaw
Salamandridae	Notophthalmus meridionalis	FMNH93536
Salamandridae	Notophthalmus meridionalis	ZMB 32914	https://www.phenome10k.org/notophthalmus-meridionalis		skull without lower jaw
Salamandridae	Notophthalmus perstriatus	FMNH93538 (two specimens)
Salamandridae	Notophthalmus viridescens dorsalis	FMNH93537 (two specimens)
Salamandridae	Notophthalmus viridescens louisianensis	FMNH86110
Salamandridae	Notophthalmus viridescens louisianensis	FMNH264514
Salamandridae	Notopthalmus viridescen viridescens	FMNH86111 (two specimens)
Salamandridae	Notopthalmus viridescen viridescens	FMNH45897
Salamandridae	Notopthalmus viridescen viridescens	FMNH93502
Salamandridae	Notopthalmus viridescen viridescens	FMNH93501
Salamandridae	Notopthalmus viridescen viridescens	FMNH93504
Salamandridae	Notopthalmus viridescen viridescens	FMNH86107
Salamandridae	Notophthalmus viridescens		1) Reilly SM. 1986. Ontogeny of cranial ossification in the eatern newt, Notophthalmus viridescens (Caudata: Salamandridae), and its relationship to metamorphosis and neoteny. Journal of Morphology, 188: 3154-326. 2) Naylor BG. (1978). The frontosquamosal arch in newts as a defence against predators. Cannadia Journal of Zoology, 56: 2211-2217.
Salamandridae	Notophthalmus viridescens	MNHN 2007 2496	https://www.phenome10k.org/notophthalmus-viridescens		skull without lower jaw
Salamandridae	Omatotriton oephryticus	ZMB 84383	https://phenome10k.org/ommatotriton-oephryticus		skull without lower jaw
Salamandridae	Ommatotriton vittatus		Naylor BG. (1978). The frontosquamosal arch in newts as a defence against predators. Cannadia Journal of Zoology, 56: 2211-2217.
Salamandridae	Ommatotriton vittatus	ZMB 14219	https://phenome10k.org/ommatotriton-vittatus		skull without lower jaw
Salamandridae	Pachytriton breviceps	FMNH24395
Salamandridae	Pachytriton breviceps	FMNH7733
Salamandridae	Pachytriton breviceps		WU Y, Wang Y, Hanken J. 2012 Comparative Osteology of the Genus Pachytriton (Caudata: Salamandridae) from Southeastern China. Asian Herpetological Research 3(2): 83-102.
Salamandridae	Pachytriton breviceps	ZMB 9101	https://phenome10k.org/pachytriton-brevipes		skull without lower jaw
Salamandridae	Pachytriton archospotus		WU Y, Wang Y, Hanken J. 2012 Comparative Osteology of the Genus Pachytriton (Caudata: Salamandridae) from Southeastern China. Asian Herpetological Research 3(2): 83-102.
Salamandridae	Pachytriton inexpectatus		WU Y, Wang Y, Hanken J. 2012 Comparative Osteology of the Genus Pachytriton (Caudata: Salamandridae) from Southeastern China. Asian Herpetological Research 3(2): 83-102.
Salamandridae	Pachytriton labiatus	MNHN 1997 4995	https://phenome10k.org/pachytriton-labiatus		skull without lower jaw
Salamandridae	Paramesotriton chinensis	BMNH 1953.1.7.55	https://phenome10k.org/paramesotriton-chinensis		skull without lower jaw
Salamandridae	Paramesotriton deloustali	ZMB 38189	https://phenome10k.org/paramesotriton-deloustali		skull without lower jaw
Salamandridae	Paramesotriton hongkongensis	MNHN 1988 4246	https://phenome10k.org/paramesotriton-hongkongensis		skull without lower jaw
Salamandridae	Paramesotriton maolanensis		Gu X, Chen R, Tian Y, Li S, Ran J. 2012. A new species of Paramesotriton (Caudata: Salamandridae) from Guizhou province, China. Zootaxa, 3510: 41-52.
Salamandridae	Pleurodeles waltl	FML30803
Salamandridae	Pleurodeles waltl	FML30804
Salamandridae	Pleurodeles waltl	MVZ 177903	http://digimorph.org/specimens/Pleurodeles_waltl/head/		skull
Salamandridae	Pleuredeles waltl		Corsin J. 1966. The development of the Osteocranium of Pleurodeles waltlii Michahelles. Journal of Morphology, 119: 209-216.
Salamandridae	Pleurodeles poireti	ZMB 33702	https://phenome10k.org/pleurodeles-poireti		skull without lower jaw
Salamandridae	Salamandra lanzai		Villa A, Andreone F, Boistel R, Delfino M. 2014. Skull and lower jaw osteology of the Lanza’s salamander, Salamandra lanzai (Amphibia, Caudata). In Scripta Herpetologica. Studies on Amphibians and reptiles in honour of Benedetto Lanza, pp: 171-200.
Salamandridae	Salamandra algira	ZMB 3573	https://phenome10k.org/salamandra-algira		skull without lower jaw
Salamandridae	Salamandra atra	ZMB 72400	https://phenome10k.org/salamandra-atra		skull without lower jaw
Salamandridae	Samandra corsica	BMNH no number	https://phenome10k.org/salamandra-corsica		skull without lower jaw
Salamandridae	Salamandra salamandra	MNHN 1981 1098	https://phenome10k.org/salamandra-salamandra		skull without lower jaw
Salamandridae	Salamandra salamandra	BMNH_1911.2.22.49	https://phenome10k.org/salamandra-salamandra-gigliolii-13		skull without lower jaw
Salamandridae	Salamandra salamandra	BMNH_1911.2.22.48	https://phenome10k.org/salamandra-salamandra-gigliolii-12		skull without lower jaw
Salamandridae	Salamandra salamandra	BMNH_1911.2.22.46	https://phenome10k.org/salamandra-salamandra-gigliolii-10		skull without lower jaw
Salamandridae	Salamandra salamandra	BMNH_1911.2.22.45	https://phenome10k.org/salamandra-salamandra-gigliolii-9		skull without lower jaw
Salamandridae	Salamandra salamandra	BMNH_1911.12.21.13	https://phenome10k.org/salamandra-salamandra-gigliolii-7		skull without lower jaw
Salamandridae	Salamandra salamandra	BMNH_1911.12.21.12	https://phenome10k.org/salamandra-salamandra-gigliolii-6		skull without lower jaw
Salamandridae	Salamandra salamandra	BMNH_1911.12.21.11	https://phenome10k.org/salamandra-salamandra-gigliolii-5		skull without lower jaw
Salamandridae	Salamandra salamandra	BMNH_1911.12.21.10	https://phenome10k.org/salamandra-salamandra-gigliolii-4		skull without lower jaw
Salamandridae	Salamandra salamandra	BMNH_1911.2.22.51	https://phenome10k.org/salamandra-salamandra-gigliolii-15		skull without lower jaw
Salamandridae	Salamandra salamandra	BMNH_no_number_2	https://phenome10k.org/salamandra-salamandra-gigliolii-40		skull without lower jaw
Salamandridae	Salamandra salamandra	BMNH_1911.2.22.no_number	https://phenome10k.org/salamandra-salamandra-gigliolii-3		skull without lower jaw
Salamandridae	Salamandra salamandra	BMNH_no_number_1	https://phenome10k.org/salamandra-salamandra-gigliolii-39		skull without lower jaw
Salamandridae	Salamandra salamandra	BMNH_1852.12.11.64	https://phenome10k.org/salamandra-salamandra-gigliolii		skull without lower jaw
Salamandridae	Salamandra salamandra	BMNH_1911.12.21.14	https://phenome10k.org/salamandra-salamandra-gigliolii-8		skull without lower jaw
Salamandridae	Salamandra salamandra	BMNH_1911.2.22.64L	https://phenome10k.org/salamandra-salamandra-gigliolii-38		skull without lower jaw
Salamandridae	Salamandra salamandra	BMNH_1911.2.22.64J	https://phenome10k.org/salamandra-salamandra-gigliolii-37		skull without lower jaw
Salamandridae	Salamandra salamandra	BMNH_1911.2.22.64K	https://phenome10k.org/salamandra-salamandra-gigliolii-36		skull without lower jaw
Salamandridae	Salamandra salamandra	BMNH_1911.2.22.64H	https://phenome10k.org/salamandra-salamandra-gigliolii-35		skull without lower jaw
Salamandridae	Salamandra salamandra	BMNH_1911.2.22.64G	https://phenome10k.org/salamandra-salamandra-gigliolii-34		skull without lower jaw
Salamandridae	Salamandra salamandra	BMNH_1911.2.22.33	https://phenome10k.org/salamandra-salamandra-gigliolii-2		skull without lower jaw
Salamandridae	Salamandra salamandra	BMNH_1911.2.22.64F	https://phenome10k.org/salamandra-salamandra-gigliolii-33		skull without lower jaw
Salamandridae	Salamandra salamandra	BMNH_1911.2.22.64E	https://phenome10k.org/salamandra-salamandra-gigliolii-32		skull without lower jaw
Salamandridae	Salamandra salamandra	BMNH_1911.2.22.64D	https://phenome10k.org/salamandra-salamandra-gigliolii-31		skull without lower jaw
Salamandridae	Salamandra salamandra	BMNH_1911.2.22.64C	https://phenome10k.org/salamandra-salamandra-gigliolii-30		skull without lower jaw
Salamandridae	Salamandra salamandra	BMNH_1911.2.22.64B	https://phenome10k.org/salamandra-salamandra-gigliolii-29		skull without lower jaw
Salamandridae	Salamandra salamandra	BMNH_1911.2.22.64J	https://phenome10k.org/salamandra-salamandra-gigliolii-37		skull without lower jaw
Salamandridae	Salamandra salamandra	BMNH_1911.2.22.64K	https://phenome10k.org/salamandra-salamandra-gigliolii-36		skull without lower jaw
Salamandridae	Salamandra salamandra	BMNH_1911.2.22.64H	https://phenome10k.org/salamandra-salamandra-gigliolii-35		skull without lower jaw
Salamandridae	Salamandra salamandra	BMNH_1911.2.22.64G	https://phenome10k.org/salamandra-salamandra-gigliolii-34		skull without lower jaw
Salamandridae	Salamandra salamandra	BMNH_1911.2.22.64L	https://phenome10k.org/salamandra-salamandra-gigliolii-38		skull without lower jaw
Salamandridae	Salamandra salamandra	BMNH_1911.2.22.64F	https://phenome10k.org/salamandra-salamandra-gigliolii-33		skull without lower jaw
Salamandridae	Salamandra salamandra	BMNH_1911.2.22.64E	https://phenome10k.org/salamandra-salamandra-gigliolii-32		skull without lower jaw
Salamandridae	Salamandra salamandra	BMNH_1911.2.22.64D	https://phenome10k.org/salamandra-salamandra-gigliolii-31		skull without lower jaw
Salamandridae	Salamandra salamandra	BMNH_1911.2.22.64C	https://phenome10k.org/salamandra-salamandra-gigliolii-30		skull without lower jaw
Salamandridae	Salamandra salamandra	BMNH_1911.2.22.64A	https://phenome10k.org/salamandra-salamandra-gigliolii-28		skull without lower jaw
Salamandridae	Salamandra salamandra	BMNH_1911.2.22.61	https://phenome10k.org/salamandra-salamandra-gigliolii-25		skull without lower jaw
Salamandridae	Salamandra salamandra	BMNH_1911.2.22.50	https://phenome10k.org/salamandra-salamandra-gigliolii-14		skull without lower jaw
Salamandridae	Salamandra salamandra	BMNH_1911.2.22.53	https://phenome10k.org/salamandra-salamandra-gigliolii-17		skull without lower jaw
Salamandridae	Salamandra salamandra	BMNH_1911.2.22.54	https://phenome10k.org/salamandra-salamandra-gigliolii-18		skull without lower jaw
Salamandridae	Salamandra salamandra	BMNH_1911.2.22.63	https://phenome10k.org/salamandra-salamandra-gigliolii-27		skull without lower jaw
Salamandridae	Salamandra salamandra	BMNH_1911.2.22.55	https://phenome10k.org/salamandra-salamandra-gigliolii-19		skull without lower jaw
Salamandridae	Salamandra salamandra	BMNH_1911.2.22.56	https://phenome10k.org/salamandra-salamandra-gigliolii-20		skull without lower jaw
Salamandridae	Salamandra salamandra	BMNH_1911.2.22.57	https://phenome10k.org/salamandra-salamandra-gigliolii-21		skull without lower jaw
Salamandridae	Salamandra salamandra	BMNH_1911.2.22.58	https://phenome10k.org/salamandra-salamandra-gigliolii-22		skull without lower jaw
Salamandridae	Salamandra salamandra	BMNH_1911.2.22.59	https://phenome10k.org/salamandra-salamandra-gigliolii-23		skull without lower jaw
Salamandridae	Salamandra salamandra	BMNH_1911.2.22.60	https://phenome10k.org/salamandra-salamandra-gigliolii-24		skull without lower jaw
Salamandridae	Salamandra salamandra	BMNH_1911.2.22.47	https://phenome10k.org/salamandra-salamandra-gigliolii-11		skull without lower jaw
Salamandridae	Salamandra salamandra	FMNH275834
Salamandridae	Salamandra salamandra	FMNH276272
Salamandridae	Salamandra salamandra	FMNH276273
Salamandridae	Salamandra salamandra	FMNH276271
Salamandridae	Salamandra infraimmaculata semenovi		Akia F, Rastegar-Pouyani N, Faizi H. 2010. The comparison of cranial osteology of Neurergus microspilotus and Salamandra infraimmaculata semenovi (Amphibia: Salamandridae). Russian Journal of Herpetology, 17 (3): 179-184.
Salamandridae	Salamandrina sp	FMNH250683
Salamandridae	Salamandrina perspicillata		Pitruzzella G, Delfino M, BöHME, Rook L. 2008. Osteology of genus Salamandrina: preliminary observation from a paleontological perspective. Herpetologia Sardiniae, 8: 412-415.
Salamandridae	Salamandrina terdigitata	FMNH84906
Salamandridae	Salamandrina terdigitata		Pitruzzella G, Delfino M, BöHME, Rook L. 2008. Osteology of genus Salamandrina: preliminary observation from a paleontological perspective. Herpetologia Sardiniae, 8: 412-415.
Salamandridae	Salamandrina terdigitata	MNHN 0 6402	https://phenome10k.org/salamandrina-terdigitata		skull without lower jaw
Salamandridae	Taricha granulosa	FMNH283809
Salamandridae	Taricha granulosa	FMNH85011
Salamandridae	Taricha granulosa	FMNH858010
Salamandridae	Taricha granulosa	FMNH207785
Salamandridae	Taricha granulosa	FMNH207789
Salamandridae	Taricha granulosa	FMNH276355
Salamandridae	Taricha granulosa	ZMB 49169	https://www.phenome10k.org/taricha-granulosa		skull without lower jaw
Salamandridae	Taricha rivularis	FMNH85343
Salamandridae	Taricha rivularis	BMNH 1957.1.7.43 44	https://www.phenome10k.org/taricha-rivularis		skull without lower jaw
Salamandridae	Taricha torosa	FMNH207787
Salamandridae	Taricha torosa	FMNH207788
Salamandridae	Taricha torosa	FMNH207786
Salamandridae	Taricha torosa	TNHC 19196	http://digimorph.org/specimens/Taricha_torosa/head/		skull
Salamandridae	Triturus carnifex		Vukov TD, Ivanovic A, Tomasevic N, Dzukic G, Kalezic ML. 2007. Braincase-body size relations in European newts (Triturus app., Salamandridae, Caudata): does size matter=. Ann. Zool. Fennici, 44: 232-239.
Salamandridae	Triturus carnifex	ZMB 8441	https://www.phenome10k.org/triturus-carnifex		skull without lower jaw
Salamandridae	Triturus cristatus	FMNH93539
Salamandridae	Triturus cristatus		Vukov TD, Ivanovic A, Tomasevic N, Dzukic G, Kalezic ML. 2007. Braincase-body size relations in European newts (Triturus app., Salamandridae, Caudata): does size matter=. Ann. Zool. Fennici, 44: 232-239.
Salamandridae	Triturus cristatus	MNHN A376	https://www.phenome10k.org/triturus-cristatus		skull without lower jaw
Salamandridae	Triturus karelinii		Vukov TD, Ivanovic A, Tomasevic N, Dzukic G, Kalezic ML. 2007. Braincase-body size relations in European newts (Triturus app., Salamandridae, Caudata): does size matter=. Ann. Zool. Fennici, 44: 232-239.
Salamandridae	Triturus dobrogicus		Vukov TD, Ivanovic A, Tomasevic N, Dzukic G, Kalezic ML. 2007. Braincase-body size relations in European newts (Triturus app., Salamandridae, Caudata): does size matter=. Ann. Zool. Fennici, 44: 232-239.
Salamandridae	Carpathotriton matraensis†		Venczel M. 2008. A new salamandrid amphibian from THE Middle Miocene of Hungary and its phylogenetic relationships. Journal of Systematic Paleontology, 6. 41-59.		Middle Miocene
Sirenidae	Pseudobranchus axanthus	UF 167203	https://phenome10k.org/pseudobranchus-axanthus		skull without lower jaw
Sirenidae	Pseudobranchus striatus	247633 (two specimens)
Sirenidae	Pseudobranchus striatus	FMNH276295
Sirenidae	Pseudobranchus striatus	FMNH275823
Sirenidae	Pseudobranchus striatus	FMNH275822
Sirenidae	Pseudobranchus striatus	FMNH276330
Sirenidae	Pseudobranchus striatus	UF179649	https://www.morphosource.org/Detail/MediaDetail/Show/media_id/24968		skull
Sirenidae	Pseudobranchus striatus	UF179649	https://www.morphosource.org/Detail/MediaDetail/Show/media_id/24968	M24968-117214	skull
Sirenidae	Pseudobranchus striatus	BMNH 1929.6.1.36	https://phenome10k.org/pseudobranchus-striatus		skull without lower jaw
Sirenidae	Siren intermedia	FMNH84082
Sirenidae	Siren intermedia	FMNH245464
Sirenidae	Siren intermedia	FMNH287709
Sirenidae	Siren intermedia		Reilly SM, Altig R. 1996. Cranial Onotogeny in Siren intermedia (Caudata: Sirenidae): paedomorphic, metamorphic, and novel patterns of heterochrony. Copeia, 1996 (1): 29-41.
Sirenidae	Siren intermedia	UF123993	https://www.morphosource.org/Detail/MediaDetail/Show/media_id/9009		skull and forelimbs
Sirenidae	Siren intermedia	CM20144	https://www.morphosource.org/Detail/SpecimenDetail/Show/specimen_id/21112	M38794-70698	skull
Sirenidae	Siren intermedia	UF 123993	https://www.phenome10k.org/siren-intermedia		skull without lower jaw
Sirenidae	Siren lacertina	FMNH22002
Sirenidae	Siren lacertina	UF149576	http://digimorph.org/specimens/Siren_lacertina/head/		skull
Sirenidae	Siren lacertina	UF123993	https://www.morphosource.org/Detail/SpecimenDetail/Show/specimen_id/3570	M9009-11936	skull
Sirenidae	Siren lacertina	MNHN 1986 1905	https://www.phenome10k.org/siren-lacertina		skull without lower jaw
Incertae Sedis	Marmorerpeton kermacki†		Evans SE, Milner AR, Mussett F. 1988. The earliest known salamanders (Amphibia, Caudata): a record from the Middle Jurassic of England. Geobios, 21: 539-552.		pre-Upper Jurassic
Incertae Sedis	Valdotriton gracilis†		Carrol, 2007. The palaeozoic ancestry of salamanders, frogs and caecilians. Zoological Journal of the Linnean Society, 150: 1-140.		pre-Upper Jurassic
Incertae Sedis	Jeholotriton paradoxus †		1) Wang Y, Rose C. 2005. Jeholotriton paradoxus (Amphibia: Caudata) from theLower Cretaceous of Southeastern inner Mongolia, China. Journal of Vertebrate Paleontology, 25: 523-532. 2) Gao KQ, Chen J. Jia J. 2013. Taxonomic diversity , startigraphic range, and exceptional preservation of Juro-Cretaceous salamanders from northern China. Ca. J. Earth Sci., 50: 255-267.		Lower Cretaceus
Acronyms
FMNH	Field Museum of Natural History
FML	Fundación Miguel Lillo
UF	University of Florida
MVZ	Museum of Vertebrate Zoology at Berkeley, Berkeley, California, United States of America
NCSM	North Carolina Museum of Natural Sciences Herpetology collection
TNHC	Texas Memorial Museum
DRV	Private Collection of David R. Vieites
IBH	Colección Nacional de Anfibios y Reptiles, Mexico City
HA	Center for Biological Diversity, University of Guyana (HA 1500)
ZMB	Zoological Museum of Berlin, Berlin, Germany
CM	Carnegie Museum of Natural History, Pittsburgh, Pennsylvania, United States
UMMZ	University of Michigan Museum of Zoology, Ann Arbor, MI, USA

## Sheet: Gymnophiona
Family	Species	Specimen (collection number-FMNH)	Descriptions revised from literature
Caeciliidae	Caecilia orientalis		Pérez OD, Lai NB, Buckley D, del Pino EM, Wake MH. 2009. The Morphology of Prehatching Embryos of Caecilia orientalis (Amphibia: Gymnophiona: Caeciliidae). Journal of Morphology, 270: 1492-1502.
Caeciliidae	Caecilia tentaculata	FMNH189354
Caeciliidae	Caecilia tentaculata		Wilkinson M, San Mauro D, Sherrat E, Gower DJ. 2011. A nine-familys classification of caecilians (Amphibia: Gymnophiona)- Zootaxa, 2874: 41-64
Caeciliidae	Caecilia tentaculata	BMNH field tag MW3945	https://phenome10k.org/caecilia-tentaculata		**
Caeciliidae	Geotrypetes seraphini	FMNH189102
Dermophiidae	Dermophis mexicanus		Wake M, Hanken J. 1982. Development of the skull of Dermophis mexicanus (Amphibia: Gymnophiona), with comments on skull kinesis and Amphibian relationships. Journal of Morphology, 173: 203-223.
Dermophiidae	Dermophis mexicanus		Wilkinson M, San Mauro D, Sherrat E, Gower DJ. 2011. A nine-familys classification of caecilians (Amphibia: Gymnophiona)- Zootaxa, 2874: 41-65
Dermophiidae	Dermophis mexicanus	MVZ 179494	http://digimorph.org/specimens/Dermophis_mexicanus/
Dermophiidae	Geotrypetes serafini	BMNH field tag MW4543	https://phenome10k.org/geotrypetes-seraphini	Additional Media: MicroCT scanned at the Natural History Museum (NHM) with a Nikon (Metris) X-Tek HMX ST 225 by Emma Sherratt	**
Dermophiidae	Gymnophis multiplicata	FMNH189131
Dermophiidae	Gymnophis multiplicata	FMNH189129
Dermophiidae	Gymnophis multiplicata		Walsh DM. 1987. Systematics of the caecilians. PhD thesis Faculty of Graduate Studies and Research, McGill University, Montreal.
Dermophiidae	Gymnophis multiplicata	BM1907.10.9.10	https://phenome10k.org/gymnopis-multiplicata	Additional Media: MicroCT scanned at the Natural History Museum (NHM) with a Nikon (Metris) X-Tek HMX ST 225 by Emma Sherratt	**
Herpelidae	Hypogeophis rostratus	FMNH276353
Herpelidae	Boulengerula boulengeri		Marshal AF, Bardua C, Gower DJ, Wilkinson M, Sherratt E, Goswami A. 2019. High-density three-dimensional morphometric analyses support conserved static (intraspecific) modularity in caecilian (Amphibia: Gymnophiona) crania. Biological Journal of the Linnean Society, 126: 721-743
Herpelidae	Boulengerula boulengeri		Sherrat E, Gower DJ, Klingenberg CP, Wilkinson M. 2014. Evolution of Cranial Shape in Caecilians (Amphibia: Gymnophiona). Evol Biol, 41: 528-545.
Herpelidae	Boulengerula boulengeri	BMNH 2000.474	https://phenome10k.org/boulengerula-boulengeri-43	MicroCT scanned at the Natural History Museum (NHM) with a Nikon (Metris) X-Tek HMX ST 225 by Emma Sherratt	**
Herpelidae	Boulengerula boulengeri	BMNH 2005.320	https://phenome10k.org/boulengerula-boulengeri-42	MicroCT scan of male specimen. Scan details available in Table S2 of Marshall et al. (2019)	**
Herpelidae	Boulengerula boulengeri	BMNH 2005.319	https://phenome10k.org/boulengerula-boulengeri-41	MicroCT scan of male specimen. Scan details available in Table S2 of Marshall et al. (2019)	**
Herpelidae	Boulengerula boulengeri	BMNH 1946.9.5.1	https://phenome10k.org/boulengerula-boulengeri	MicroCT scan of male specimen. Scan details available in Table S2 of Marshall et al. (2019)
Herpelidae	Boulengerula boulengeri	BMNH 2000.476	https://phenome10k.org/boulengerula-boulengeri-3	MicroCT scan of female specimen. Scan details available in Table S2 of Marshall et al. (2019).	**
Herpelidae	Boulengerula boulengeri	BMNH 2000.555	https://phenome10k.org/boulengerula-boulengeri-4	https://phenome10k.org/boulengerula-boulengeri-4	**
Herpelidae	Boulengerula boulengeri	BMNH 2000.556	https://phenome10k.org/boulengerula-boulengeri-5	MicroCT scan of male specimen. Scan details available in Table S2 of Marshall et al. (2019)	**
Herpelidae	Boulengerula boulengeri	BMNH 2000.607	https://phenome10k.org/boulengerula-boulengeri-6	MicroCT scan of female specimen. Scan details available in Table S2 of Marshall et al. (2019).	**
Herpelidae	Boulengerula boulengeri	BMNH 2000.611	https://phenome10k.org/boulengerula-boulengeri-7	MicroCT scan of male specimen. Scan details available in Table S2 of Marshall et al. (2019)	**
Herpelidae	Boulengerula boulengeri	BMNH 2000.621	https://phenome10k.org/boulengerula-boulengeri-8	MicroCT scan of female specimen. Scan details available in Table S2 of Marshall et al. (2019).	**
Herpelidae	Boulengerula boulengeri	BMNH 2000.629	https://phenome10k.org/boulengerula-boulengeri-9	MicroCT scan of male specimen. Scan details available in Table S2 of Marshall et al. (2019).	**
Herpelidae	Boulengerula boulengeri	BMNH 2000.631	https://phenome10k.org/boulengerula-boulengeri-10	MicroCT scan of male specimen. Scan details available in Table S2 of Marshall et al. (2019)	**
Herpelidae	Boulengerula boulengeri	BMNH 2000.696	https://phenome10k.org/boulengerula-boulengeri-11	MicroCT scan of female specimen. Scan details available in Table S2 of Marshall et al. (2019).	**
Herpelidae	Boulengerula boulengeri	BMNH 2000.706	https://phenome10k.org/boulengerula-boulengeri-12	MicroCT scan of female specimen. Scan details available in Table S2 of Marshall et al. (2019).	**
Herpelidae	Boulengerula boulengeri	BMNH 2000.713	https://phenome10k.org/boulengerula-boulengeri-13	MicroCT scan of male specimen. Scan details available in Table S2 of Marshall et al. (2019)	**
Herpelidae	Boulengerula boulengeri	BMNH 2002.771	https://phenome10k.org/boulengerula-boulengeri-14	MicroCT scan of female specimen. Scan details available in Table S2 of Marshall et al. (2019).	**
Herpelidae	Boulengerula boulengeri	BMNH 2002.774	https://phenome10k.org/boulengerula-boulengeri-15	MicroCT scan of female specimen. Scan details available in Table S2 of Marshall et al. (2019).	**
Herpelidae	Boulengerula boulengeri	BMNH 2002.776	https://phenome10k.org/boulengerula-boulengeri-16	MicroCT scan of male specimen. Scan details available in Table S2 of Marshall et al. (2019)	**
Herpelidae	Boulengerula boulengeri	BMNH 2002.778	https://phenome10k.org/boulengerula-boulengeri-17	MicroCT scan of female specimen. Scan details available in Table S2 of Marshall et al. (2019).	**
Herpelidae	Boulengerula boulengeri	BMNH 2002.785	https://phenome10k.org/boulengerula-boulengeri-18	MicroCT scan of male specimen. Scan details available in Table S2 of Marshall et al. (2019)	**
Herpelidae	Boulengerula boulengeri	BMNH 2002.789	https://phenome10k.org/boulengerula-boulengeri-19	MicroCT scan of female specimen. Scan details available in Table S2 of Marshall et al. (2019).	**
Herpelidae	Boulengerula boulengeri	BMNH 2002.792	https://phenome10k.org/boulengerula-boulengeri-20	MicroCT scan of female specimen. Scan details available in Table S2 of Marshall et al. (2019).	**
Herpelidae	Boulengerula boulengeri	BMNH 2002.795	https://phenome10k.org/boulengerula-boulengeri-21	MicroCT scan of male specimen. Scan details available in Table S2 of Marshall et al. (2019)	**
Herpelidae	Boulengerula boulengeri	BMNH 2002.796	https://phenome10k.org/boulengerula-boulengeri-22	MicroCT scan of male specimen. Scan details available in Table S2 of Marshall et al. (2019)	**
Herpelidae	Boulengerula boulengeri	BMNH 2002.797	https://phenome10k.org/boulengerula-boulengeri-23	MicroCT scan of male specimen. Scan details available in Table S2 of Marshall et al. (2019).	**
Herpelidae	Boulengerula boulengeri	BMNH 2002.800	https://phenome10k.org/boulengerula-boulengeri-24	MicroCT scan of female specimen. Scan details available in Table S2 of Marshall et al. (2019).	**
Herpelidae	Boulengerula boulengeri	BMNH 2002.801	https://phenome10k.org/boulengerula-boulengeri-25	MicroCT scan of male specimen. Scan details available in Table S2 of Marshall et al. (2019)	**
Herpelidae	Boulengerula boulengeri	BMNH 2002.809	https://phenome10k.org/boulengerula-boulengeri-26	MicroCT scan of female specimen. Scan details available in Table S2 of Marshall et al. (2019).	**
Herpelidae	Boulengerula boulengeri	BMNH 2002.812	https://phenome10k.org/boulengerula-boulengeri-27	MicroCT scan of female specimen. Scan details available in Table S2 of Marshall et al. (2019).	**
Herpelidae	Boulengerula boulengeri	BMNH 2002.815	https://phenome10k.org/boulengerula-boulengeri-28	MicroCT scan of female specimen. Scan details available in Table S2 of Marshall et al. (2019).	**
Herpelidae	Boulengerula boulengeri	BMNH 2002.816	https://phenome10k.org/boulengerula-boulengeri-29	MicroCT scan of male specimen. Scan details available in Table S2 of Marshall et al. (2019)	**
Herpelidae	Boulengerula boulengeri	BMNH 2002.820	https://phenome10k.org/boulengerula-boulengeri-30	MicroCT scan of female specimen. Scan details available in Table S2 of Marshall et al. (2019).	**
Herpelidae	Boulengerula boulengeri	BMNH 2002.821	https://phenome10k.org/boulengerula-boulengeri-31	MicroCT scan of female specimen. Scan details available in Table S2 of Marshall et al. (2019).	**
Herpelidae	Boulengerula boulengeri	BMNH 2002.830	https://phenome10k.org/boulengerula-boulengeri-32	MicroCT scan of male specimen. Scan details available in Table S2 of Marshall et al. (2019)	**
Herpelidae	Boulengerula boulengeri	BMNH 2002.835	https://phenome10k.org/boulengerula-boulengeri-33	MicroCT scan of male specimen. Scan details available in Table S2 of Marshall et al. (2019)	**
Herpelidae	Boulengerula boulengeri	BMNH 2002.836	https://phenome10k.org/boulengerula-boulengeri-34	MicroCT scan of male specimen. Scan details available in Table S2 of Marshall et al. (2019)	**
Herpelidae	Boulengerula boulengeri	BMNH 2002.841	https://phenome10k.org/boulengerula-boulengeri-35	MicroCT scan of male specimen. Scan details available in Table S2 of Marshall et al. (2019)	**
Herpelidae	Boulengerula boulengeri	BMNH 2002.846	https://phenome10k.org/boulengerula-boulengeri-36	MicroCT scan of male specimen. Scan details available in Table S2 of Marshall et al. (2019)	**
Herpelidae	Boulengerula boulengeri	BMNH 2002.848	https://phenome10k.org/boulengerula-boulengeri-37	MicroCT scan of female specimen. Scan details available in Table S2 of Marshall et al. (2019).	**
Herpelidae	Boulengerula boulengeri	BMNH 2002.849	https://phenome10k.org/boulengerula-boulengeri-38	MicroCT scan of female specimen. Scan details available in Table S2 of Marshall et al. (2019).	**
Herpelidae	Boulengerula boulengeri	BMNH 2002.854	https://phenome10k.org/boulengerula-boulengeri-39	MicroCT scan of male specimen. Scan details available in Table S2 of Marshall et al. (2019)	**
Herpelidae	Boulengerula boulengeri	BMNH 2005.319	https://phenome10k.org/boulengerula-boulengeri-40	MicroCT scan of male specimen. Scan details available in Table S2 of Marshall et al. (2019).	**
Herpelidae	Boulengerula boulengeri	BMNH 2005.319	https://phenome10k.org/boulengerula-boulengeri-41	MicroCT scan of male specimen. Scan details available in Table S2 of Marshall et al. (2019)	**
Herpelidae	Boulengerula boulengeri	BMNH2000474	https://phenome10k.org/boulengerula-boulengeri-43	MicroCT scanned at the Natural History Museum (NHM) with a Nikon (Metris) X-Tek HMX ST 225 by Emma Sherratt	**
Herpelidae	Herpele squalostoma		Wilkinson M, San Mauro D, Sherrat E, Gower DJ. 2011. A nine-familys classification of caecilians (Amphibia: Gymnophiona)- Zootaxa, 2874: 41-66
Herpelidae	Herpele squalostoma	FMNH168830
Indotyphlidae	Grandisonia alternans		Christine JA. 2016. A overview of Caecilians (Lissamphibia: Gymnophiona)
Indotyphlidae	Grandisonia alternans		Carrol, 2007. The palaeozoic ancestry of salamanders, frogs and caecilians. Zoological Journal of the Linnean Society, 150: 1-140.
Indotyphlidae	Grandisonia alternans	BMNH 1956.1.13.39	https://phenome10k.org/grandisonia-alternans	Additional Media: MicroCT scanned at the Natural History Museum (NHM) with a Nikon (Metris) X-Tek HMX ST 225 by Emma Sherratt.		**
Indotyphlidae	Grandisonia schellensis		Muller H. 2007. Developmental morphological diversity in caecilian amphibians: systematic and evolutionary implications. Leiden University Press. 266 pp
Indotyphlidae	Geneophis ramaswamii		Muller H, Oommen OV, Bartsch P. 2005. Sekeletal development of the direct-developing caecilian Geneophis ramaswamii (Amphibia: Gymnophiona: Caecilidae). Zoomorphology, 124: 171-188.
Indotyphlidae	Hypogeophis rostratus		Christine JA. 2016. A overview of Caecilians (Lissamphibia: Gymnophiona)
Indotyphlidae	Hypogeophis rostratus		Muller H. 2006. Ontogeny of the skull, lower jaw, and hyobranquial skeleton of Hypogeophis rostratus (Amphibia: Gymnophiona: Caeciliidae) revisited. Journal of Morphology, 267: 968-986.
Indotyphlidae	Hypogeophis rostratus	FMNH276397
Indotyphlidae	Hypogeophis rostratus	UMMZ 179847	https://phenome10k.org/hypogeophis-rostratus	MicroCT scanned at the Natural History Museum (NHM) with a Nikon (Metris) X-Tek HMX ST 225 by Emma Sherratt	**
Ichthyophiidae	Ichthyophis asplenius	FMNH189165
Ichthyophiidae	Ichthyophis bannanicus		Muller H. 2007. Developmental morphological diversity in caecilian amphibians: systematic and evolutionary implications. Leiden University Press. 266 pp
Ichthyophiidae	Ichthyophis bannanicus	MVZ 236728	http://digimorph.org/specimens/Ichthyophis_bannanicus/
Ichthyophiidae	Ichthyophis beddomei	FMNH189229
Ichthyophiidae	Ichthyophis glutinosus	FMNH147676
Ichthyophiidae	Ichthyophis glutinosus	FMNH147686
Ichthyophiidae	Ichthyophis glutinosus	FMNH76339
Ichthyophiidae	Ichthyophis glutinosus	FMNH137997
Ichthyophiidae	Ichthyophis glutinosus		Carrol, 2007. The palaeozoic ancestry of salamanders, frogs and caecilians. Zoological Journal of the Linnean Society, 150: 1-140.
Ichthyophiidae	Ichthyophis glutinosus		Wilkinson M, San Mauro D, Sherrat E, Gower DJ. 2011. A nine-familys classification of caecilians (Amphibia: Gymnophiona)- Zootaxa, 2874: 41-67
Ichthyophiidae	Ichthyophis kohtaoensis	FMNH189242
Ichthyophiidae	Ichthyophis cf. kohtaoensis		Christine JA. 2016. A overview of Caecilians (Lissamphibia: Gymnophiona).
Ichthyophiidae	Ichthyophis cf. kohtaoensis		Muller H. 2007. Developmental morphological diversity in caecilian amphibians: systematic and evolutionary implications. Leiden University Press. 266 pp
Ichthyophiidae	Ichthyophis laosensis	ncsm-herp:86611	https://www.morphosource.org/Detail/MediaDetail/Show/media_id/24472
Ichthyophiidae	Ichthyophis larutensis	FMNH189167
Ichthyophiidae	Ichthyophis monochrous	FMNH50959
Indotyphlidae	Ichthyophis monochrous	FMNH50977
Ichthyophiidae	Ichthyophis multicolor		Wilkinson M, Presswell B, Sherrat E, Papadopoulou A, Gower DJ. 2014. A new species of striped Ichthyophis Fitzinger, 1826 (Amphibia: Gymnophiona: Ichthyophiidae) from Myanmar. Zootaxa, 3785: 045-058.
Indotyphlidae	Ichthyophis nigroflava	FMNH189245
Indotyphlidae	Ichthyophis sp	FMNH189310
Indotyphlidae	Ichthyophis sp	FMNH189298
Indotyphlidae	Idiocranium russeli		Marshal AF, Bardua C, Gower DJ, Wilkinson M, Sherratt E, Goswami A. 2019. High-density three-dimensional morphometric analyses support conserved static (intraspecific) modularity in caecilian (Amphibia: Gymnophiona) crania. Biological Journal of the Linnean Society, 126: 721-742
Indotyphlidae	Idiocranium russeli		Wake M. 1986. The morphology of Idiocranium russeli (Amphibia: Gymnophiona), with comments on miniaturization through heterochrony. Journal of Morphology, 189: 1-16.
Indotyphlidae	Idiocranium russeli		Thesca T, Wilkinson M, Gower DJ, Muller H. 2018. Musculoskeletal development of the Central African caecilian Idiocranium russeli (Amphibia: Gymnophiona: Indotyphlidae) and its bearing on the re-evolution of larvae in caecilian amphibians. Zoomorphology https://doi.org/10.1007/s00435-018-0420-0.
Indotyphlidae	Idiocranium russeli	UCMZ 10	https://phenome10k.org/idiocranium-russeli-22	MicroCT scan of male specimen. Scan details available in Table S2 of Marshall et al. (2019)	**
Indotyphlidae	Idiocranium russeli	BMNH 1946.9.5.70	https://phenome10k.org/idiocranium-russeli	MicroCT scan of male specimen. Scan details available in Table S2 of Marshall et al. (2019)	**
Indotyphlidae	Idiocranium russeli	BMNH 1946.9.5.76	https://phenome10k.org/idiocranium-russeli-2	MicroCT scan of male specimen. Scan details available in Table S2 of Marshall et al. (2019)	**
Indotyphlidae	Idiocranium russeli	BMNH 1946.9.5.80	https://phenome10k.org/idiocranium-russeli-3	MicroCT scan of female specimen. Scan details available in Table S2 of Marshall et al. (2019).	**
Indotyphlidae	Idiocranium russeli	BMNH 1946.9.5.84	https://phenome10k.org/idiocranium-russeli-4	MicroCT scan of female specimen. Scan details available in Table S2 of Marshall et al. (2019).	**
Indotyphlidae	Idiocranium russeli	MW 8359	https://phenome10k.org/idiocranium-russeli-5	MicroCT scan of male specimen. Scan details available in Table S2 of Marshall et al. (2019)	**
Indotyphlidae	Idiocranium russeli	MW 8469	https://phenome10k.org/idiocranium-russeli-6	MicroCT scan of male specimen. Scan details available in Table S2 of Marshall et al. (2019)	**
Indotyphlidae	Idiocranium russeli	MW 8511	https://phenome10k.org/idiocranium-russeli-7	MicroCT scan of female specimen. Scan details available in Table S2 of Marshall et al. (2019).	**
Indotyphlidae	Idiocranium russeli	MW 8618	https://phenome10k.org/idiocranium-russeli-8	MicroCT scan of female specimen. Scan details available in Table S2 of Marshall et al. (2019).	**
Indotyphlidae	Idiocranium russeli	MW 8648	https://phenome10k.org/idiocranium-russeli-9	MicroCT scan of male specimen. Scan details available in Table S2 of Marshall et al. (2019)	**
Indotyphlidae	Idiocranium russeli	MW 8649	https://phenome10k.org/idiocranium-russeli-10	MicroCT scan of female specimen. Scan details available in Table S2 of Marshall et al. (2019).	**
Indotyphlidae	Idiocranium russeli	MW 8650	https://phenome10k.org/idiocranium-russeli-11	MicroCT scan of female specimen. Scan details available in Table S2 of Marshall et al. (2019).	**
Indotyphlidae	Idiocranium russeli	MW 8692	https://phenome10k.org/idiocranium-russeli-12	MicroCT scan of female specimen. Scan details available in Table S2 of Marshall et al. (2019).	**
Indotyphlidae	Idiocranium russeli	MW 8693	https://phenome10k.org/idiocranium-russeli-13	MicroCT scan of female specimen. Scan details available in Table S2 of Marshall et al. (2019).	**
Indotyphlidae	Idiocranium russeli	UCMZ 1	https://phenome10k.org/idiocranium-russeli-14	MicroCT scan of female specimen. Scan details available in Table S2 of Marshall et al. (2019).	**
Indotyphlidae	Idiocranium russeli	UCMZ 3	https://phenome10k.org/idiocranium-russeli-15	MicroCT scan; scan details available in Table S2 of Marshall et al. (2019).	**
Indotyphlidae	Idiocranium russeli	UCMZ 4	https://phenome10k.org/idiocranium-russeli-16	MicroCT scan of male specimen. Scan details available in Table S2 of Marshall et al. (2019)	**
Indotyphlidae	Idiocranium russeli	UCMZ 5	https://phenome10k.org/idiocranium-russeli-17	MicroCT scan of female specimen. Scan details available in Table S2 of Marshall et al. (2019).	**
Indotyphlidae	Idiocranium russeli	UCMZ 6	https://phenome10k.org/idiocranium-russeli-18	MicroCT scan of female specimen. Scan details available in Table S2 of Marshall et al. (2019).	**
Indotyphlidae	Idiocranium russeli	UCMZ 7	https://phenome10k.org/idiocranium-russeli-19	MicroCT scan of female specimen. Scan details available in Table S2 of Marshall et al. (2019).	**
Indotyphlidae	Idiocranium russeli	UCMZ 8	https://phenome10k.org/idiocranium-russeli-20	MicroCT scan of female specimen. Scan details available in Table S2 of Marshall et al. (2019).	**
Indotyphlidae	Idiocranium russeli	UCMZ 9	https://phenome10k.org/idiocranium-russeli-21	MicroCT scan of male specimen. Scan details available in Table S2 of Marshall et al. (2019)	**
Indotyphlidae	Idiocranium russeli	UCMZ 10	https://phenome10k.org/idiocranium-russeli-22	MicroCT scan of male specimen. Scan details available in Table S2 of Marshall et al. (2019)	**
Indotyphlidae	Idiocranium russeli	UCMZ 11	https://phenome10k.org/idiocranium-russeli-23	MicroCT scan of female specimen. Scan details available in Table S2 of Marshall et al. (2019).	**
Indotyphlidae	Idiocranium russeli	UCMZ 12	https://phenome10k.org/idiocranium-russeli-24	MicroCT scan of male specimen. Scan details available in Table S2 of Marshall et al. (2019)	**
Indotyphlidae	Idiocranium russeli	UCMZ 13	https://phenome10k.org/idiocranium-russeli-25	MicroCT scan of female specimen. Scan details available in Table S2 of Marshall et al. (2019).	**
Indotyphlidae	Idiocranium russeli	UCMZ 14	https://phenome10k.org/idiocranium-russeli-26	MicroCT scan of male specimen. Scan details available in Table S2 of Marshall et al. (2019)	**
Indotyphlidae	Idiocranium russeli	UCMZ 16	https://phenome10k.org/idiocranium-russeli-27	MicroCT scan of female specimen. Scan details available in Table S2 of Marshall et al. (2019).	**
Indotyphlidae	Idiocranium russeli	UCMZ 17	https://phenome10k.org/idiocranium-russeli-28	MicroCT scan of female specimen. Scan details available in Table S2 of Marshall et al. (2019).	**
Indotyphlidae	Idiocranium russeli	UCMZ 18	https://phenome10k.org/idiocranium-russeli-29	MicroCT scan of male specimen. Scan details available in Table S2 of Marshall et al. (2019)	**
Indotyphlidae	Idiocranium russeli	UCMZ 19	https://phenome10k.org/idiocranium-russeli-30	MicroCT scan; scan details available in Table S2 of Marshall et al. (2019).	**
Indotyphlidae	Idiocranium russeli	UCMZ 20	https://phenome10k.org/idiocranium-russeli-31	MicroCT scan of male specimen. Scan details available in Table S2 of Marshall et al. (2019)	**
Indotyphlidae	Idiocranium russeli	UCMZ 21	https://phenome10k.org/idiocranium-russeli-32	Scan details available in Table S2 of Marshall et al. (2019).	**
Indotyphlidae	Idiocranium russeli	UCMZ 22	https://phenome10k.org/idiocranium-russeli-33	MicroCT scan; scan details available in Table S2 of Marshall et al. (2019).	**
Indotyphlidae	Idiocranium russeli	UCMZ 23	https://phenome10k.org/idiocranium-russeli-34	MicroCT scan of male specimen. Scan details available in Table S2 of Marshall et al. (2019)	**
Indotyphlidae	Idiocranium russeli	UCMZ 26	https://phenome10k.org/idiocranium-russeli-35	MicroCT scan; scan details available in Table S2 of Marshall et al. (2019).	**
Indotyphlidae	Idiocranium russeli	UCMZ 27	https://phenome10k.org/idiocranium-russeli-36	MicroCT scan of female specimen. Scan details available in Table S2 of Marshall et al. (2019).	**
Indotyphlidae	Indotyphlus battersbyi		Wilkinson M, San Mauro D, Sherrat E, Gower DJ. 2011. A nine-familys classification of caecilians (Amphibia: Gymnophiona)- Zootaxa, 2874: 41-68
Indotyphlidae	Oscaecilia ochrocephala	FMNH97443
Indotyphlidae	Schistometopum thomense	FMNH75755
Indotyphlidae	Praslinia cooperi		Muller H. 2007. Developmental morphological diversity in caecilian amphibians: systematic and evolutionary implications. Leiden University Press. 266 pp
Indotyphlidae	Sylvavaecilis grandisone		Muller H. 2007. Developmental morphological diversity in caecilian amphibians: systematic and evolutionary implications. Leiden University Press. 266 pp
Ichthyophiidae	Uraeotyphlus cf. narayani		Muller H. 2007. Developmental morphological diversity in caecilian amphibians: systematic and evolutionary implications. Leiden University Press. 266 pp
Ichthyophiidae	Uraeotyphlus oxyurus		Muller H. 2007. Developmental morphological diversity in caecilian amphibians: systematic and evolutionary implications. Leiden University Press. 266 pp
Rhinatrematidae	Epicrionops lativittatus		Muller H. 2007. Developmental morphological diversity in caecilian amphibians: systematic and evolutionary implications. Leiden University Press. 266 pp
Rhinatrematidae	Epicrionops bicolor		Carrol, 2007. The palaeozoic ancestry of salamanders, frogs and caecilians. Zoological Journal of the Linnean Society, 150: 1-140.
Rhinatrematidae	Epicrionops bicolor	Louisiana State University Museum of Natural Science (uncatalogued)	http://digimorph.org/specimens/Epicrionops_bicolor/
Rhinatrematidae	Epicrionops		Walsh DM. 1987. Systematics of the caecilians. PhD thesis Faculty of Graduate Studies and Research, McGill University, Montreal.
Rhinatrematidae	Rhinatrema bivittatum		Muller H. 2007. Developmental morphological diversity in caecilian amphibians: systematic and evolutionary implications. Leiden University Press. 266 pp
Rhinatrematidae	Rhinatrema bivittatum		Sherrat E, Gower DJ, Klingenberg CP, Wilkinson M. 2014. Evolution of Cranial Shape in Caecilians (Amphibia: Gymnophiona). Evol Biol, 41: 528-545.
Rhinatrematidae	Rhinatrema bivittatum		Wilkinson M, San Mauro D, Sherrat E, Gower DJ. 2011. A nine-familys classification of caecilians (Amphibia: Gymnophiona)- Zootaxa, 2874: 41-69
Scolecomorphidae	Scolecomorphus kirkii	FMNH189150
Scolecomorphidae	Scolecomorphus kirkii		Wilkinson M, San Mauro D, Sherrat E, Gower DJ. 2011. A nine-familys classification of caecilians (Amphibia: Gymnophiona)- Zootaxa, 2874: 41-70
Scolecomorphidae	Scolecomorphus vittatus	FMNH189148
Scolecomorphidae	Scolecomorphus		Walsh DM. 1987. Systematics of the caecilians. PhD thesis Faculty of Graduate Studies and Research, McGill University, Montreal.
Scolecomorphidae	Scolecomorphus sp.	Private collection of Adam Summers	http://digimorph.org/specimens/Scolecomorphus_sp/
Siphonopidae	Siphonops annulatus		Bardua C, Wilkinson M, Gower DJ, Sherrat E, Goswami A. 2019. Morphological evolution and modularity of the caecilian skull. Evolutionary Biology 19:30: 1-23.
Siphonopidae	Siphonops annulatus		Christine JA. 2016. A overview of Caecilians (Lissamphibia: Gymnophiona)
Siphonopidae	Siphonops annulatus		Wilkinson M, San Mauro D, Sherrat E, Gower DJ. 2011. A nine-familys classification of caecilians (Amphibia: Gymnophiona)- Zootaxa, 2874: 41-71
Siphonopidae	Microcaecilia iwokramae	HA 1500)	http://digimorph.org/specimens/Caecilita_iwokramae/
Typhlonectidae	Atretochoana eiselti		Wilkinson M, Nussbaum RA. 1997. Comparative morphology and evolution of the lungless caecilian Atretochoana eiselti (Taylor) (Amphibia: Gymnophiona: Typhlonectidae). Biological Journal of the Linnean Society, 62: 39-109.
Typhlonectidae	Atretochoana eiselti	UF185560	https://www.morphosource.org/Detail/MediaDetail/Show/media_id/42201	M42201-76065; M42200-76060
Typhlonectidae	Chthonerpeton indistinctus	MCP field tag MW16	https://phenome10k.org/chthonerpeton-indistinctum	MicroCT scanned at the Natural History Museum (NHM) with a Nikon (Metris) X-Tek HMX ST 225 by Emma Sherratt	**
Typhlonectidae	Typhlonectes natans	FMNH98884
Typhlonectidae	Typhlonectes natans	FMNH98885
Typhlonectidae	Typhlonectes natans	FMNH165747
Typhlonectidae	Typhlonectes natans	FMNH98886
Typhlonectidae	Typhlonectes natans	FMNH98882
Typhlonectidae	Typhlonectes natans	FMNH98881
Typhlonectidae	Typhlonectes natans	FMNH98883
Typhlonectidae	Typhlonectes natans	FMNH98887
Typhlonectidae	Typhlonectes natans		Christine JA. 2016. A overview of Caecilians (Lissamphibia: Gymnophiona)
Typhlonectidae	Typhlonectes natans		Wilkinson M, Nussbaum RA. 1997. Comparative morphology and evolution of the lungless caecilian Atretochoana eiselti (Taylor) (Amphibia: Gymnophiona: Typhlonectidae). Biological Journal of the Linnean Society, 62: 39-109.
Typhlonectidae	Typhlonectes natans	MVZ 179728	http://digimorph.org/specimens/Typhlonectes_natans/
Typhlonectidae	Typhlonectes sp		Walsh DM. 1987. Systematics of the caecilians. PhD thesis Faculty of Graduate Studies and Research, McGill University, Montreal.
Typhlonectidae	Typhlonectes compressicauda		Wilkinson M, San Mauro D, Sherrat E, Gower DJ. 2011. A nine-familys classification of caecilians (Amphibia: Gymnophiona)- Zootaxa, 2874: 41-72
Typhlonectidae	Potomotyphlus kaupii		Sherrat E, Gower DJ, Klingenberg CP, Wilkinson M. 2014. Evolution of Cranial Shape in Caecilians (Amphibia: Gymnophiona). Evol Biol, 41: 528-545.
Eocaeciliaidae	Eocaecilia†		1) Jenkins FA, Walsh DM. 1993. An early Jurassic caecilian with limbs. Nature, 365: 246-250. 2) Carrol, 2007. The palaeozoic ancestry of salamanders, frogs and caecilians. Zoological Journal of the Linnean Society, 150: 1-140

## Sheet: Temnospondyli and Lepospondyli
Lepospondyli: Aistopod: Phlegethontiidae	Phlegethontia		Walsh DM. 1987. Systematics of the caecilians. PhD thesis Faculty of Graduate Studies and Research, McGill University, Montreal.
Lepospondyli: Aistopod: Lethiscidae	Lethiscus		Walsh DM. 1987. Systematics of the caecilians. PhD thesis Faculty of Graduate Studies and Research, McGill University, Montreal.
Lepospondyli: Aistopod: Ophiderpetontidae	Ophiderpeton		Walsh DM. 1987. Systematics of the caecilians. PhD thesis Faculty of Graduate Studies and Research, McGill University, Montreal.
Lepospondyli: Gymnarthridae	Cardiocephalus		Walsh DM. 1987. Systematics of the caecilians. PhD thesis Faculty of Graduate Studies and Research, McGill University, Montreal.
Lepospondyli: Gymnarthridae	Euryodus		Walsh DM. 1987. Systematics of the caecilians. PhD thesis Faculty of Graduate Studies and Research, McGill University, Montreal.
Lepospondyli: Lysorophidae	Brachydectes		Walsh DM. 1987. Systematics of the caecilians. PhD thesis Faculty of Graduate Studies and Research, McGill University, Montreal.
Lepospondyli: Nectridea: Keraterpetontidae	Scincosaurs		Walsh DM. 1987. Systematics of the caecilians. PhD thesis Faculty of Graduate Studies and Research, McGill University, Montreal.
Lepospondyli: Nectridea: Keraterpetontidae	Diploceraspis		Walsh DM. 1987. Systematics of the caecilians. PhD thesis Faculty of Graduate Studies and Research, McGill University, Montreal.
Lepospondyli: Nectridea: Urocodylidae	Ptyonius		Walsh DM. 1987. Systematics of the caecilians. PhD thesis Faculty of Graduate Studies and Research, McGill University, Montreal.
Lepospondyli: Nectridea: Urocodylidae	Sauropleura		Walsh DM. 1987. Systematics of the caecilians. PhD thesis Faculty of Graduate Studies and Research, McGill University, Montreal.
Lepospondyli: Hyloplesiontidae	Hyloplesion longicostatus		Carrol, 2007. The palaeozoic ancestry of salamanders, frogs and caecilians. Zoological Journal of the Linnean Society, 150: 1-140.
Lepospondyli: Lysorophidae	Brachydectes elongatus		Carrol, 2007. The palaeozoic ancestry of salamanders, frogs and caecilians. Zoological Journal of the Linnean Society, 150: 1-140.
Lepospondyli: Rhynchonkidae	Rhynchonkos		1) Walsh DM. 1987. Systematics of the caecilians. PhD thesis Faculty of Graduate Studies and Research, McGill University, Montreal. 2) Carrol, 2007. The palaeozoic ancestry of salamanders, frogs and caecilians. Zoological Journal of the Linnean Society, 150: 1-140.
Lepospondyli: Hyloplesiontidae	Hyloplesion longicostatus		Carrol, 2007. The palaeozoic ancestry of salamanders, frogs and caecilians. Zoological Journal of the Linnean Society, 150: 1-140.
Temnospondyli: Amphibamidae	Doleserpeton		1) Walsh DM. 1987. Systematics of the caecilians. PhD thesis Faculty of Graduate Studies and Research, McGill University, Montreal. 2) Carrol, 2007. The palaeozoic ancestry of salamanders, frogs and caecilians. Zoological Journal of the Linnean Society, 150: 1-140.
Temnospondyli: Amphibamidae	Tersomius		Walsh DM. 1987. Systematics of the caecilians. PhD thesis Faculty of Graduate Studies and Research, McGill University, Montreal.
Temnospondyli: Paracyclotosauridae	Stanocephalosaurus birdi		Fortuny J, Marcé-Nogué J, Steyer JS, de Esteban-Triviño S, Mujal E, Gil Ll. 2016. Comparative 3D analyses and paleoecology of giant early amphibians (Temnospondyli: Stereospondyli). Scientific Reports, 6: 30387.
Temnospondyli	Edingerella madagascariensis		Fortuny J, Marcé-Nogué J, Steyer JS, de Esteban-Triviño S, Mujal E, Gil Ll. 2016. Comparative 3D analyses and paleoecology of giant early amphibians (Temnospondyli: Stereospondyli). Scientific Reports, 6: 30387.
Temnospondyli: Metoposauridae	Metoposaurus krasiejowensis		Gruntmejer K, Konietzko-Meier D, Bodzioch A. 2016. Cranial bone histology of Metoposaurus krasiejowensis (Amphibia, temnospondyli) from the Late Triassic of Poland. PeerJ, DOI 10.7717/peerj.2685
Temnospondyli: Branchiosauridae	Apateon caducus		Carrol, 2007. The palaeozoic ancestry of salamanders, frogs and caecilians. Zoological Journal of the Linnean Society, 150: 1-140.
Temnospondyli: Amphibamidae	Amphibamus grandiceps		Carrol, 2007. The palaeozoic ancestry of salamanders, frogs and caecilians. Zoological Journal of the Linnean Society, 150: 1-140.
Temnospondyli: Dendrerpetontidae	Dendrerpeton		Carrol, 2007. The palaeozoic ancestry of salamanders, frogs and caecilians. Zoological Journal of the Linnean Society, 150: 1-140.
Temnospondyli: Dendrerpetontidae	Balanerpeton		Carrol, 2007. The palaeozoic ancestry of salamanders, frogs and caecilians. Zoological Journal of the Linnean Society, 150: 1-140.
Allocaudata: Albanerpetontidae	Albanerpeton inexpectatum		1) Carrol, 2007. The palaeozoic ancestry of salamanders, frogs and caecilians. Zoological Journal of the Linnean Society, 150: 1-140.
			2) Gardner, J.D. (2003). The fossilsalamander Proamphiuma cretacea Estes (Caudata ; Amphiumidae) andrelationshipswithinthe Amphiumidae. Journal of Vertebrate Paleontology 23(4):769–782
